# Supplementary material
Source: publisher figshare collection journal article supplement (https://gsapubs.figshare.com/ndownloader/files/40676645)
Supplement: Supplementary file 1 [file 40676645]

## **Supplementary material for “Crustal structure of the Lazufre volcanic complex and the Southern Puna from 3-D inversion of magnetotelluric data: implications for surface uplift and evidence for melt storage and hydrothermal fluids”**

### **1. Magnetotelluric data**

This section contains additional figures that illustrate the measured field data. The station names and locations are listed in Table S1.

Figure S1 shows both the real (in-phase) and imaginary (out-of-phase) components of the induction vectors. These vectors are computed from the vertical magnetic fields at each MT station. If the subsurface resistivity structure were 2-D, then the vectors would all be normal to the strike direction. At short periods (1-10 s) the direction of the arrows is quite scattered, indicating a 3-D resistivity structure. At a period of 100 s the arrows are less scattered, indicating a more 2-D structure that is parallel to the Salar de Antofalla.

Figure S2 shows the phase tensors at periods of 1 s, 10 s and 100 s. As period increases, the depth of penetration in the Earth increases. The strike direction is close to the major or minor axis of the ellipse, and the rose diagram shows the statistical distribution of the major axis directions. At a period of 1 s, there is no dominant strike direction. At longer periods the signals penetrate deeper into the Earth and a strike in the range N30°E – N45°E is observed. The color filling shows the skew angle which is a measure of the 3-D nature of the impedance tensor.

| Name       | Collected by       | Latitude (°S) | Longitude (°W) | Elevation (m) |
|------------|--------------------|---------------|----------------|---------------|
| 1463N12_13 | Univ. of Alberta   | 25.652        | 66.850         | 4120          |
| 1463N14_13 | Univ. of Alberta   | 25.528        | 66.951         | 4120          |
| 1463O18_13 | Univ. of Alberta   | 25.516        | 67.591         | 3320          |
| 1463O19_13 | Univ. of Alberta   | 25.595        | 67.404         | 4620          |
| 1463O20_13 | Univ. of Alberta   | 25.517        | 67.209         | 4120          |
| 1463O21_13 | Univ. of Alberta   | 25.552        | 67.551         | 3320          |
| 1463O22_13 | Univ. of Alberta   | 25.340        | 67.906         | 4020          |
| 1463O23_13 | Univ. of Alberta   | 25.337        | 67.874         | 4020          |
| 1463O24_13 | Univ. of Alberta   | 25.288        | 68.082         | 3720          |
| 1465N12_13 | Univ. of Alberta   | 25.657        | 66.803         | 4120          |
| 1465N13_13 | Univ. of Alberta   | 25.747        | 66.711         | 4120          |
| 1465N14_13 | Univ. of Alberta   | 25.512        | 67.036         | 4420          |
| 1465O18_13 | Univ. of Alberta   | 25.617        | 67.504         | 4120          |
| 1465O19_13 | Univ. of Alberta   | 25.540        | 67.324         | 4020          |
| 1465O20_13 | Univ. of Alberta   | 25.532        | 67.274         | 4020          |
| 1465O21_13 | Univ. of Alberta   | 25.439        | 67.615         | 4020          |
| 1465O22_13 | Univ. of Alberta   | 25.308        | 67.710         | 4120          |
| 1465O23_13 | Univ. of Alberta   | 25.305        | 67.769         | 4120          |
| 1465O24_13 | Univ. of Alberta   | 25.276        | 68.216         | 4120          |
| 1465O25_13 | Univ. of Alberta   | 25.299        | 68.139         | 3920          |
| 1493O19_13 | Univ. of Alberta   | 25.599        | 67.455         | 4120          |
| 1493O20_13 | Univ. of Alberta   | 25.466        | 67.164         | 3920          |
| 1493O21_13 | Univ. of Alberta   | 25.405        | 67.672         | 4120          |
| 1493O22_13 | Univ. of Alberta   | 25.296        | 67.819         | 4320          |
| 1493O23_13 | Univ. of Alberta   | 25.344        | 68.005         | 4220          |
| 1493O24_13 | Univ. of Alberta   | 25.267        | 68.328         | 4320          |
| 1493O25_13 | Univ. of Alberta   | 25.152        | 68.447         | 4820          |
| 1494N12_13 | Univ. of Alberta   | 25.576        | 66.919         | 4220          |
| 1494N13_13 | Univ. of Alberta   | 25.732        | 66.763         | 4220          |
| 1494N14_13 | Univ. of Alberta   | 25.510        | 66.999         | 4220          |
| 1494O19_13 | Univ. of Alberta   | 25.578        | 67.366         | 4520          |
| 1494O20_13 | Univ. of Alberta   | 25.467        | 67.131         | 4120          |
| 1494O22_13 | Univ. of Alberta   | 25.485        | 67.618         | 3520          |
| 1494O23_13 | Univ. of Alberta   | 25.339        | 67.960         | 4020          |
| 1494O24_13 | Univ. of Alberta   | 25.266        | 68.289         | 4320          |
| 1494O25_13 | Univ. of Alberta   | 25.306        | 68.049         | 3720          |
| A01        | Freie Univ. Berlin | 25.283        | 68.491         | 4920          |
| A04        | Freie Univ. Berlin | 25.327        | 68.718         | 3820          |
| L01        | Freie Univ. Berlin | 25.046        | 68.574         | 3920          |
| L02        | Freie Univ. Berlin | 25.129        | 68.710         | 3620          |
| L03        | Freie Univ. Berlin | 25.236        | 68.853         | 3520          |

|     |                      |        |        |      |
|-----|----------------------|--------|--------|------|
| L04 | Freie Univ. Berlin   | 25.225 | 68.996 | 3820 |
| L05 | Freie Univ. Berlin   | 25.110 | 68.481 | 4720 |
| L06 | Freie Univ. Berlin   | 25.228 | 68.448 | 4520 |
| L07 | Freie Univ. Berlin   | 25.264 | 68.370 | 4320 |
| L08 | Freie Univ. Berlin   | 25.222 | 69.109 | 3920 |
| L09 | Freie Univ. Berlin   | 25.272 | 68.251 | 4320 |
| L10 | Freie Univ. Berlin   | 25.267 | 68.177 | 4020 |
| L14 | Freie Univ. Berlin   | 25.485 | 68.709 | 4320 |
| L15 | Freie Univ. Berlin   | 25.464 | 68.651 | 4120 |
| e04 | Universidad de Chile | 25.154 | 68.542 | 4720 |
| e10 | Universidad de Chile | 25.122 | 68.498 | 4520 |
| e12 | Universidad de Chile | 25.126 | 68.580 | 4320 |
| e14 | Universidad de Chile | 25.203 | 68.434 | 4420 |
| e15 | Universidad de Chile | 25.221 | 68.409 | 4420 |
| e16 | Universidad de Chile | 25.240 | 68.382 | 4320 |
| e17 | Universidad de Chile | 25.259 | 68.354 | 4220 |
| e18 | Universidad de Chile | 25.190 | 68.458 | 4620 |
| e19 | Universidad de Chile | 25.133 | 68.468 | 5020 |
| e20 | Universidad de Chile | 25.181 | 68.524 | 5120 |
| e22 | Universidad de Chile | 25.160 | 68.524 | 5020 |
| e23 | Universidad de Chile | 25.136 | 68.552 | 4420 |
| e24 | Universidad de Chile | 25.139 | 68.515 | 4720 |
| e26 | Universidad de Chile | 25.123 | 68.520 | 4420 |

**Table S1** : Station names and locations for the MT stations used in the 3-D inversions. Note the elevations shown are those used in the modelling, which have been adjusted to fit the 100 m discretized vertical grid size for topography. They range from 3320 m to 5120 m with an average of 4210 m.

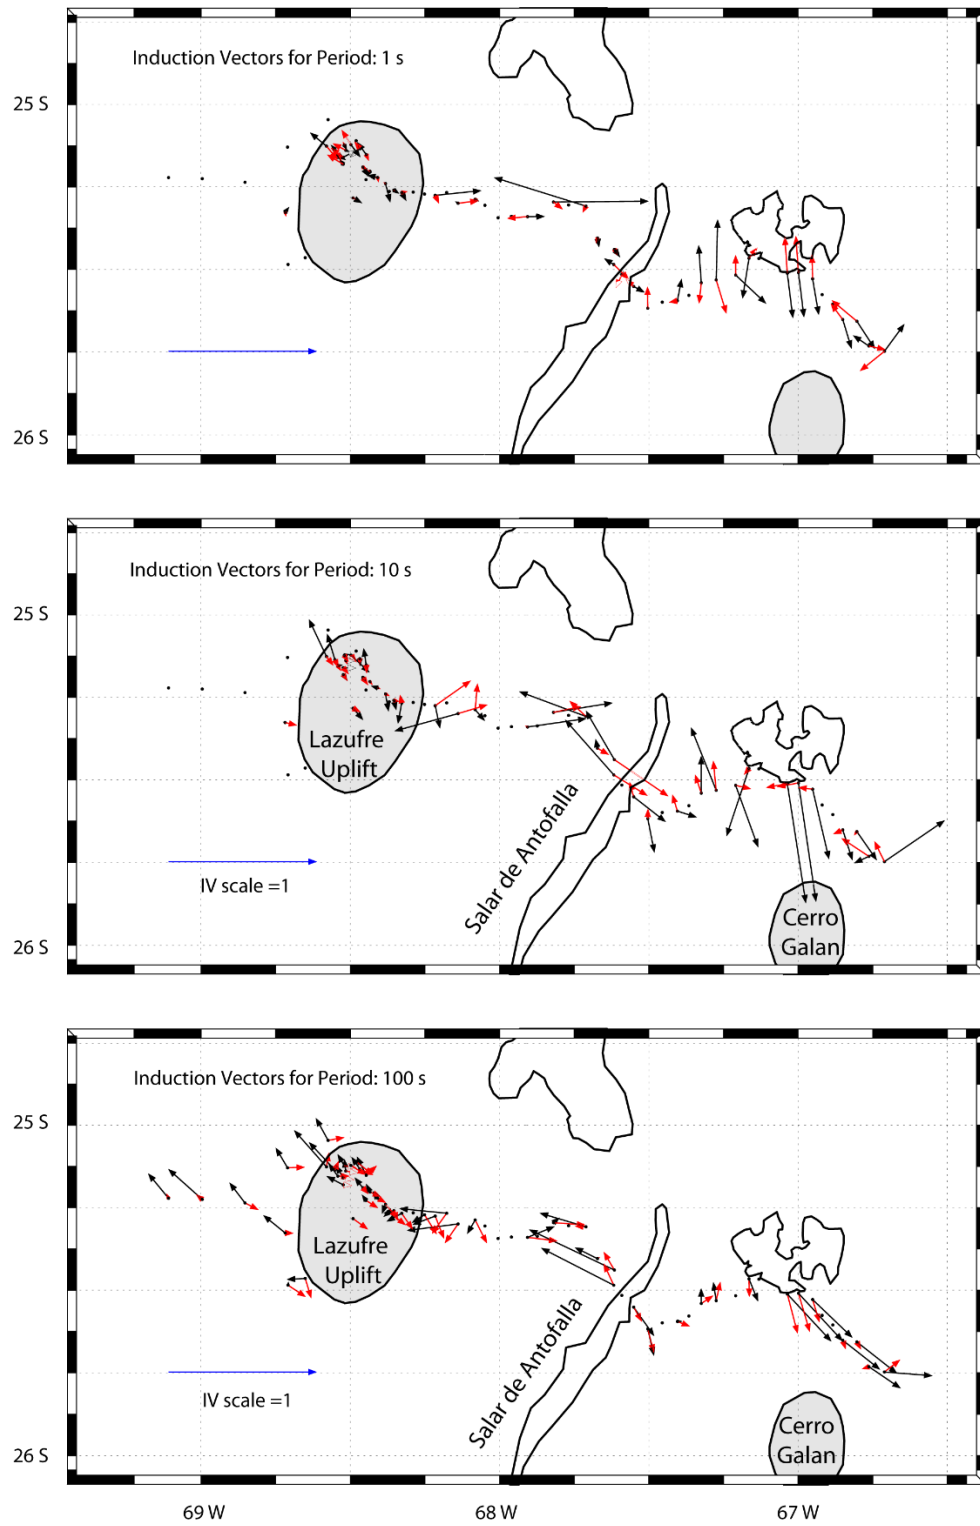

**Figure S1** : Real (black) and imaginary (red) components of the induction vectors for the Puna MT profile.



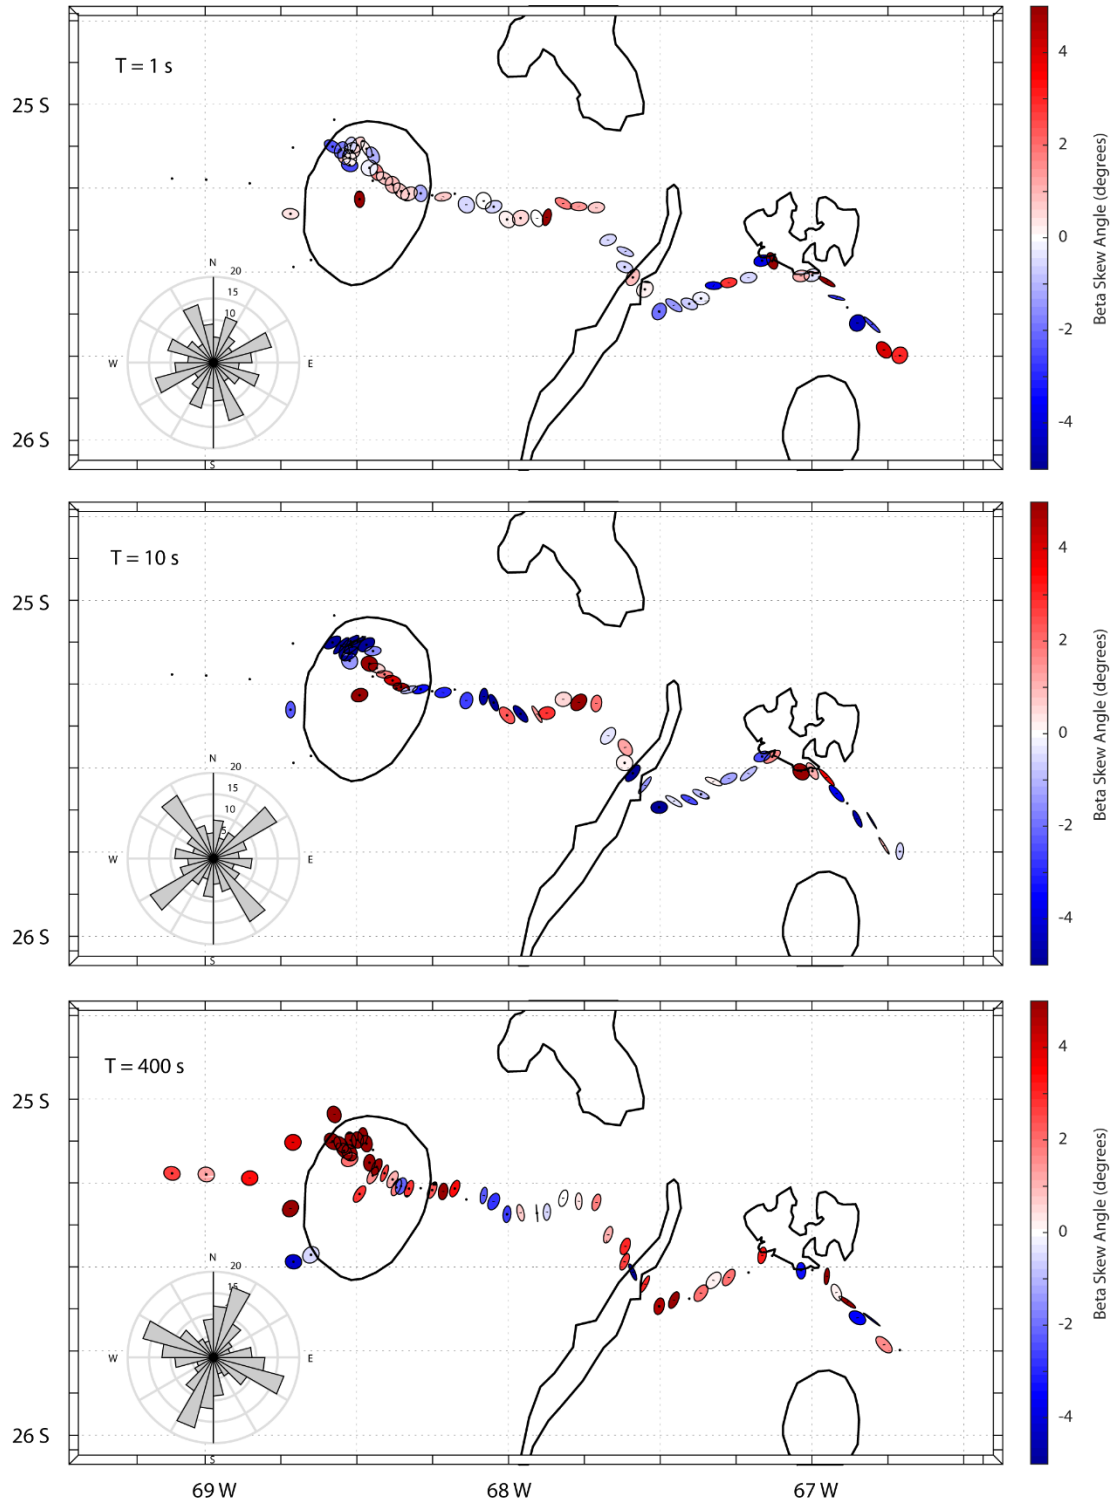

**Figure S2** : Phase tensors for the Puna MT profile. The inset rose diagrams show the azimuthal distribution of the major axes of the phase tensor ellipses. See the text for a description of the phase tensors.

## **2. Forward responses of selected 3-D inversion models**

In Figure S3 the predicted responses of the four inversion models are shown together for comparison as pseudosections of apparent resistivity, phase and tipper. The measured data are also shown for comparison. In Figure S4 the same responses are shown as residuals.

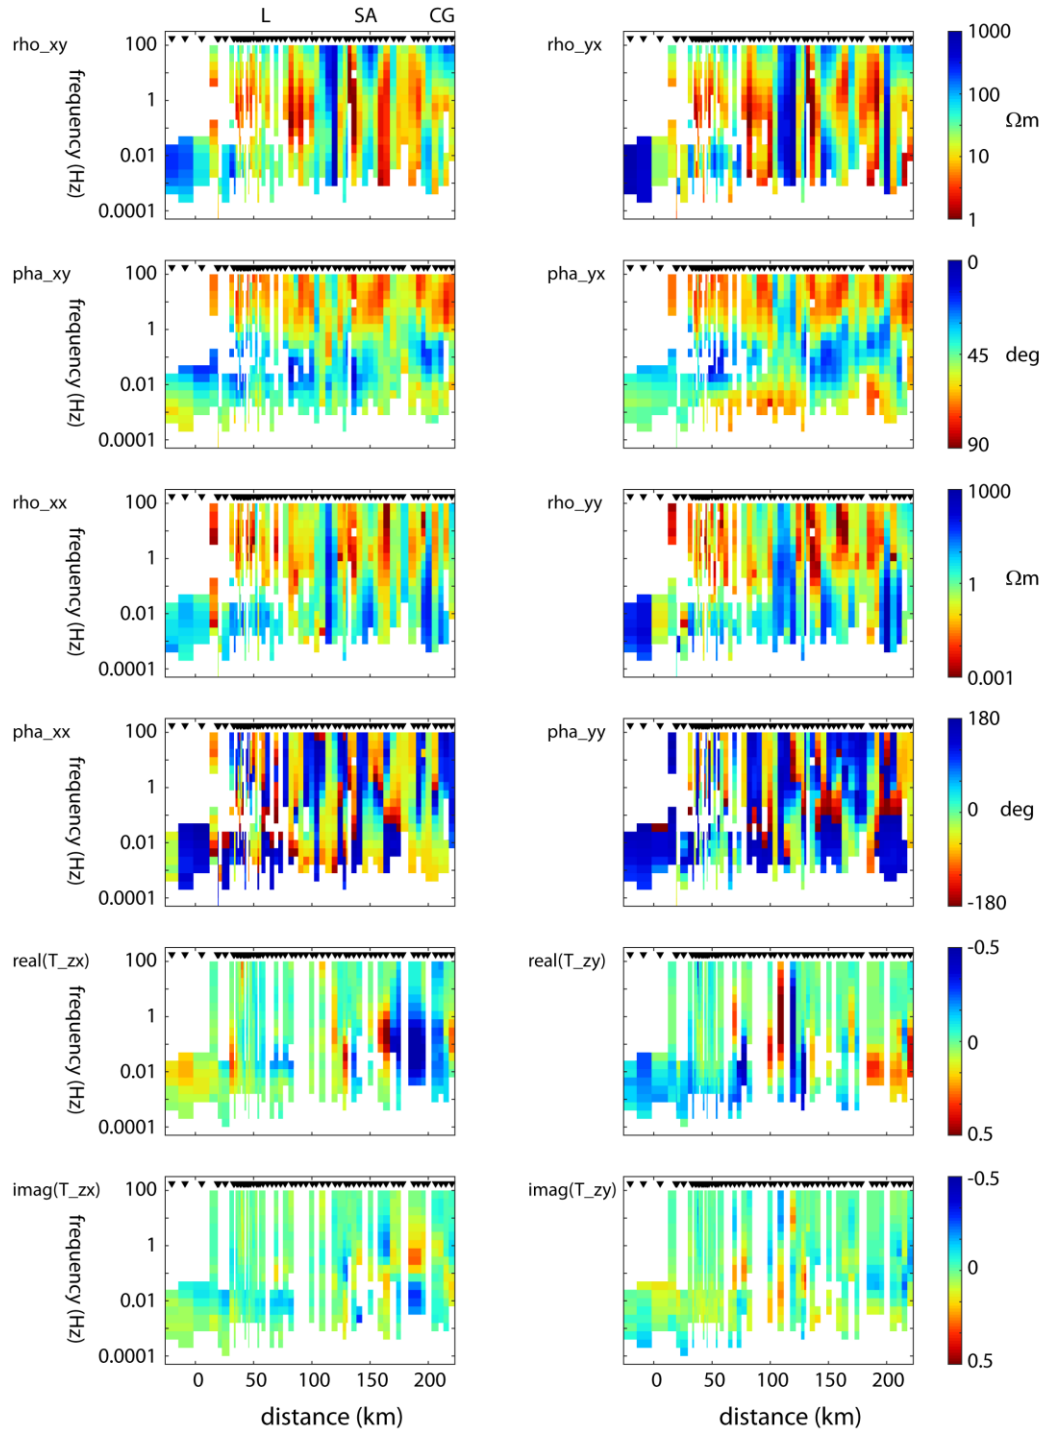

**Figure S3(a)** : Measured MT data (apparent resistivity, phase and tipper) in geographic coordinates. L = Lastarria, SA = Salar de Arizaro and CG = Cerro Galan.

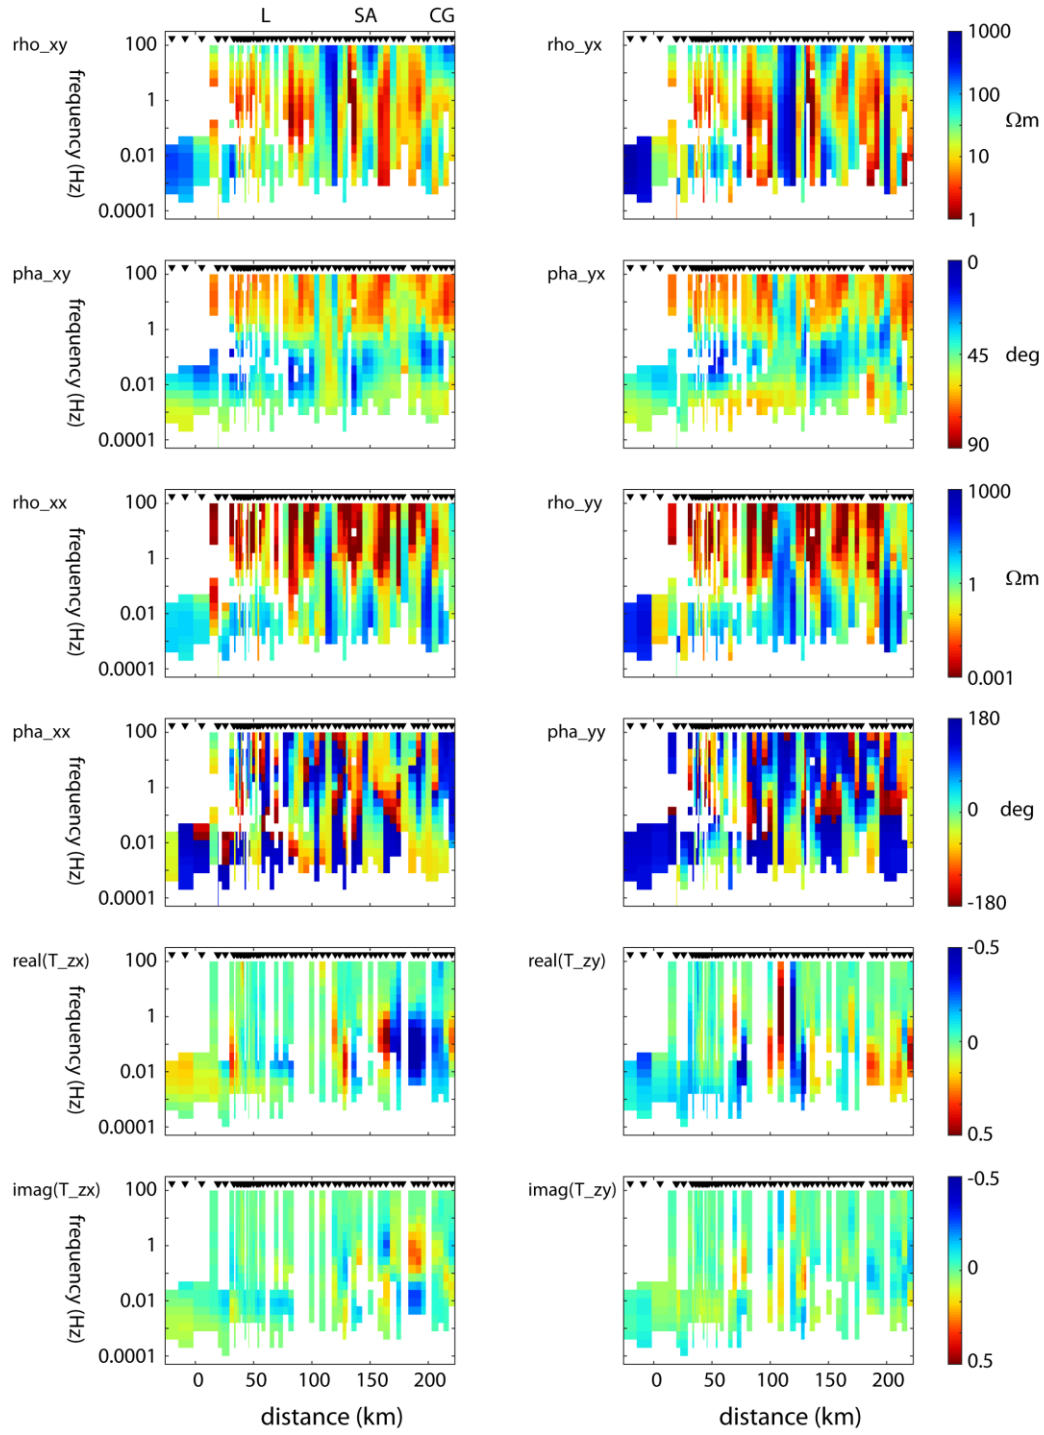

**Figure S3(b)** : Predicted MT data (apparent resistivity, phase and tipper) in geographic coordinates for inversion model *puna\_lazufre\_60a* shown in Figure 6.

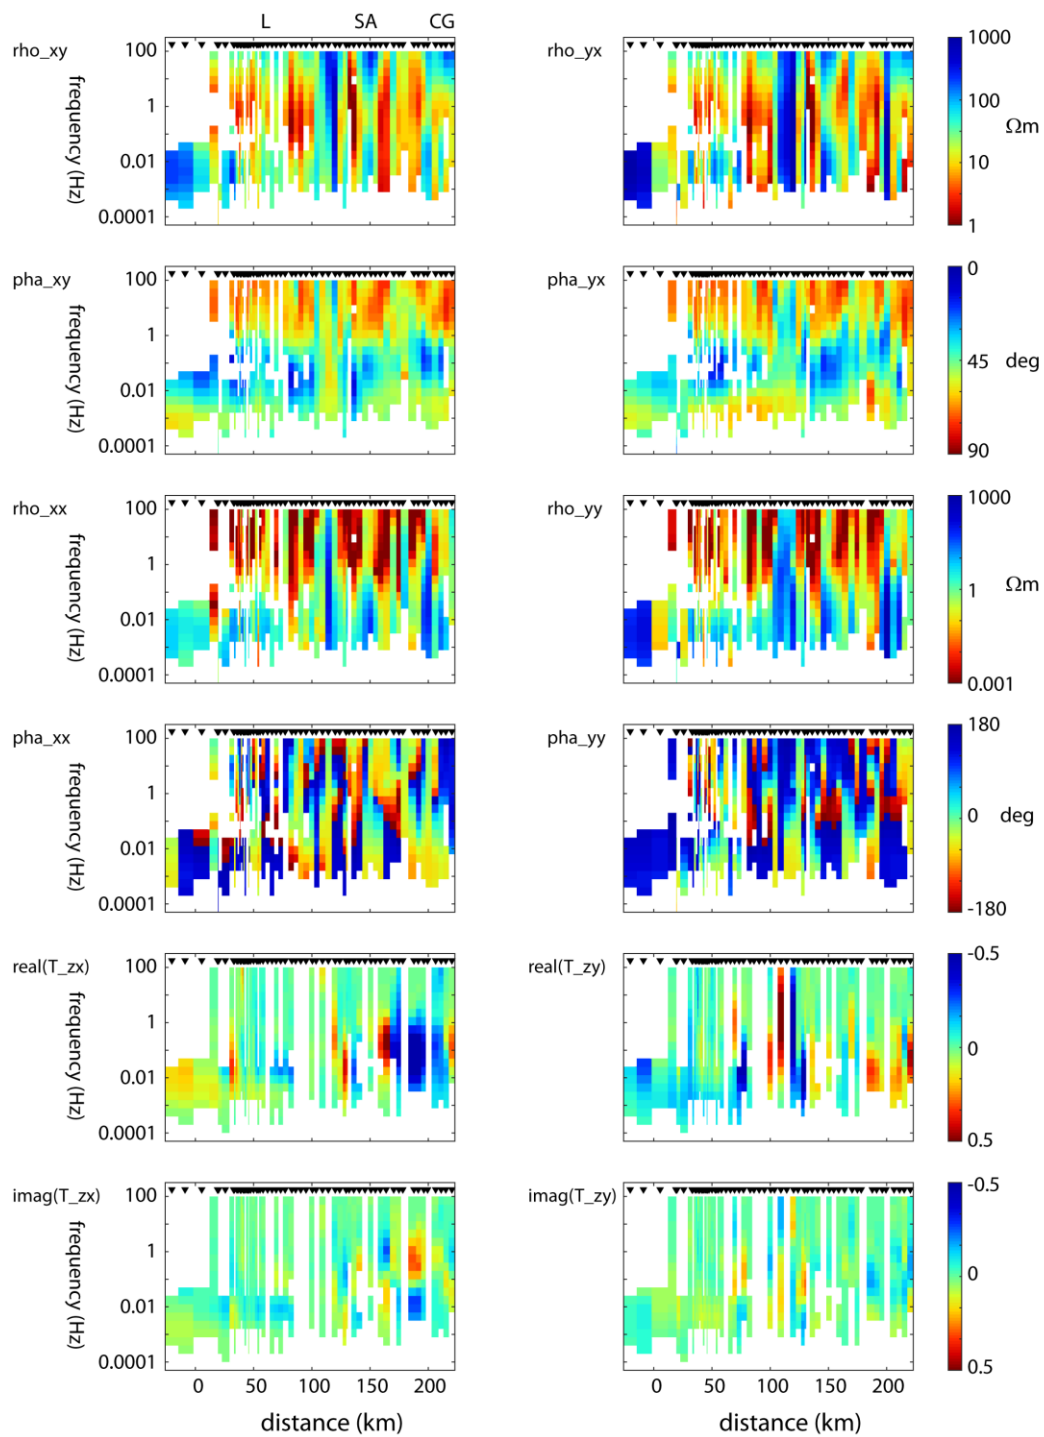

**Figure S3(c)** : Predicted MT data (apparent resistivity, phase and tipper) in geographic coordinates for inversion model *puna\_lazufre\_61c* shown in Figure 7.

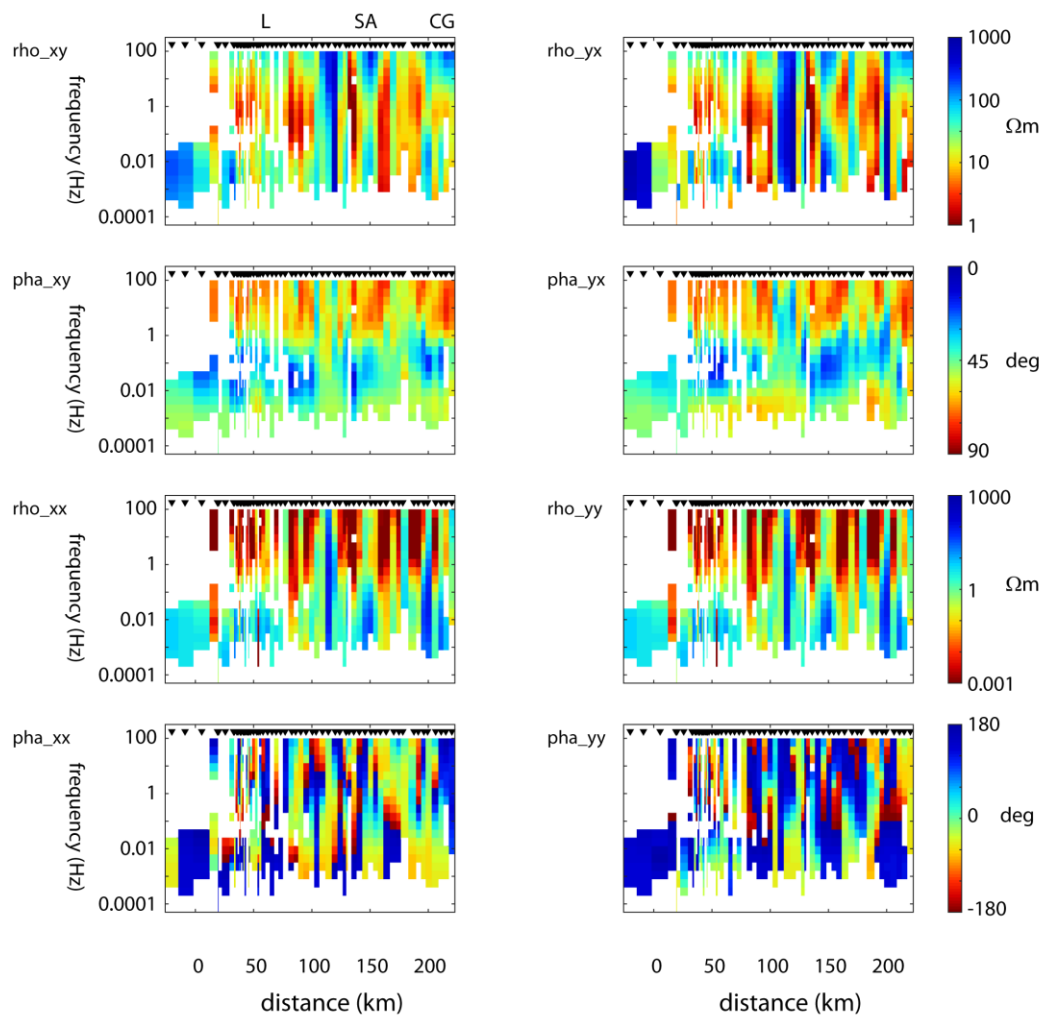

**Figure S3(d)** : Predicted MT data (apparent resistivity and phase) in geographic co-ordinates for inversion model *puna\_lazufre\_68a* obtained by inversion of impedance data only. Model is shown in Figure S5c.

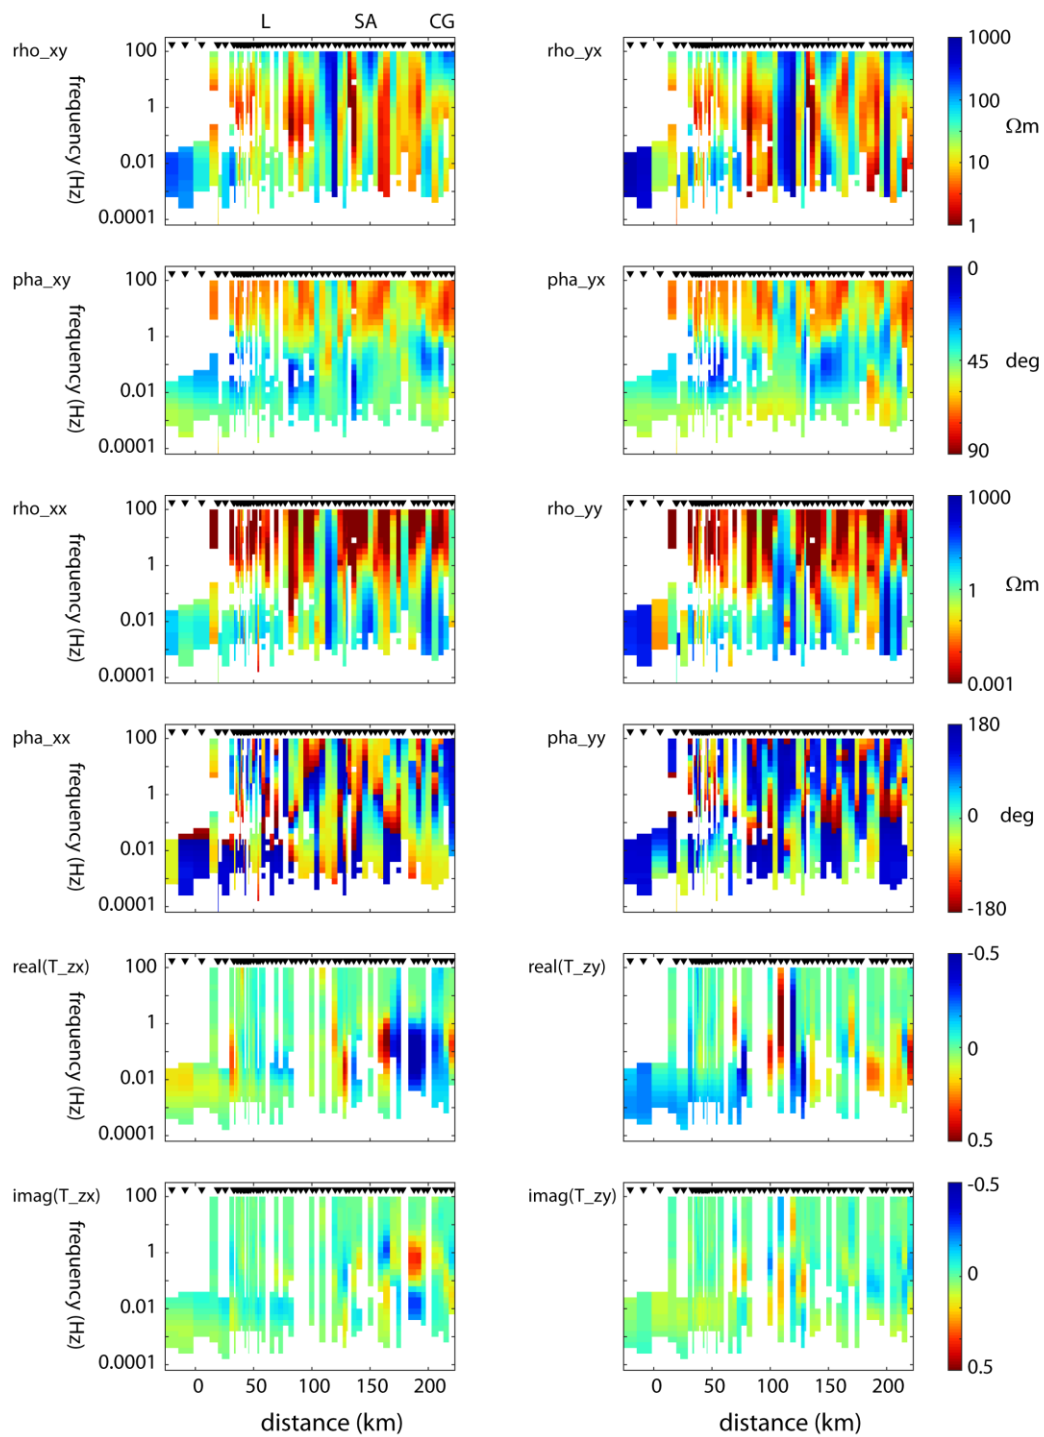

**Figure S3(e)** : Predicted MT data (apparent resistivity, phase and tipper) in geographic coordinates for inversion model *puna\_lazufre\_8a* shown in Figure S5d.

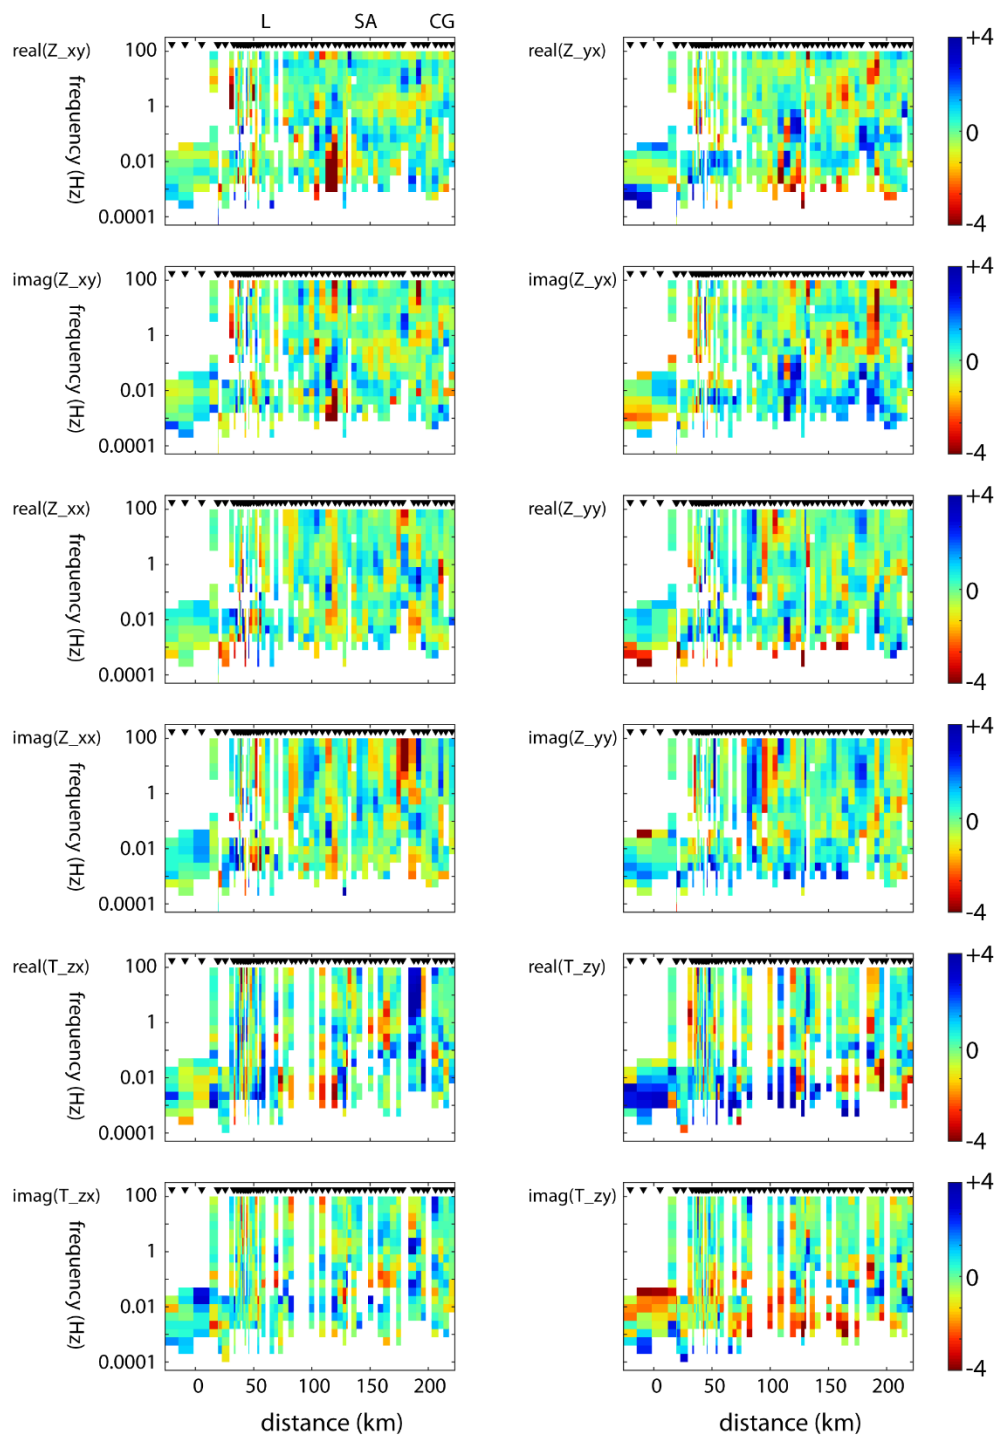

**Figure S4(a)** : Fit of predicted MT data (apparent resistivity, phase and tipper) in geographic coordinates for inversion model *puna\_lazufre\_60a* plotted as residuals.



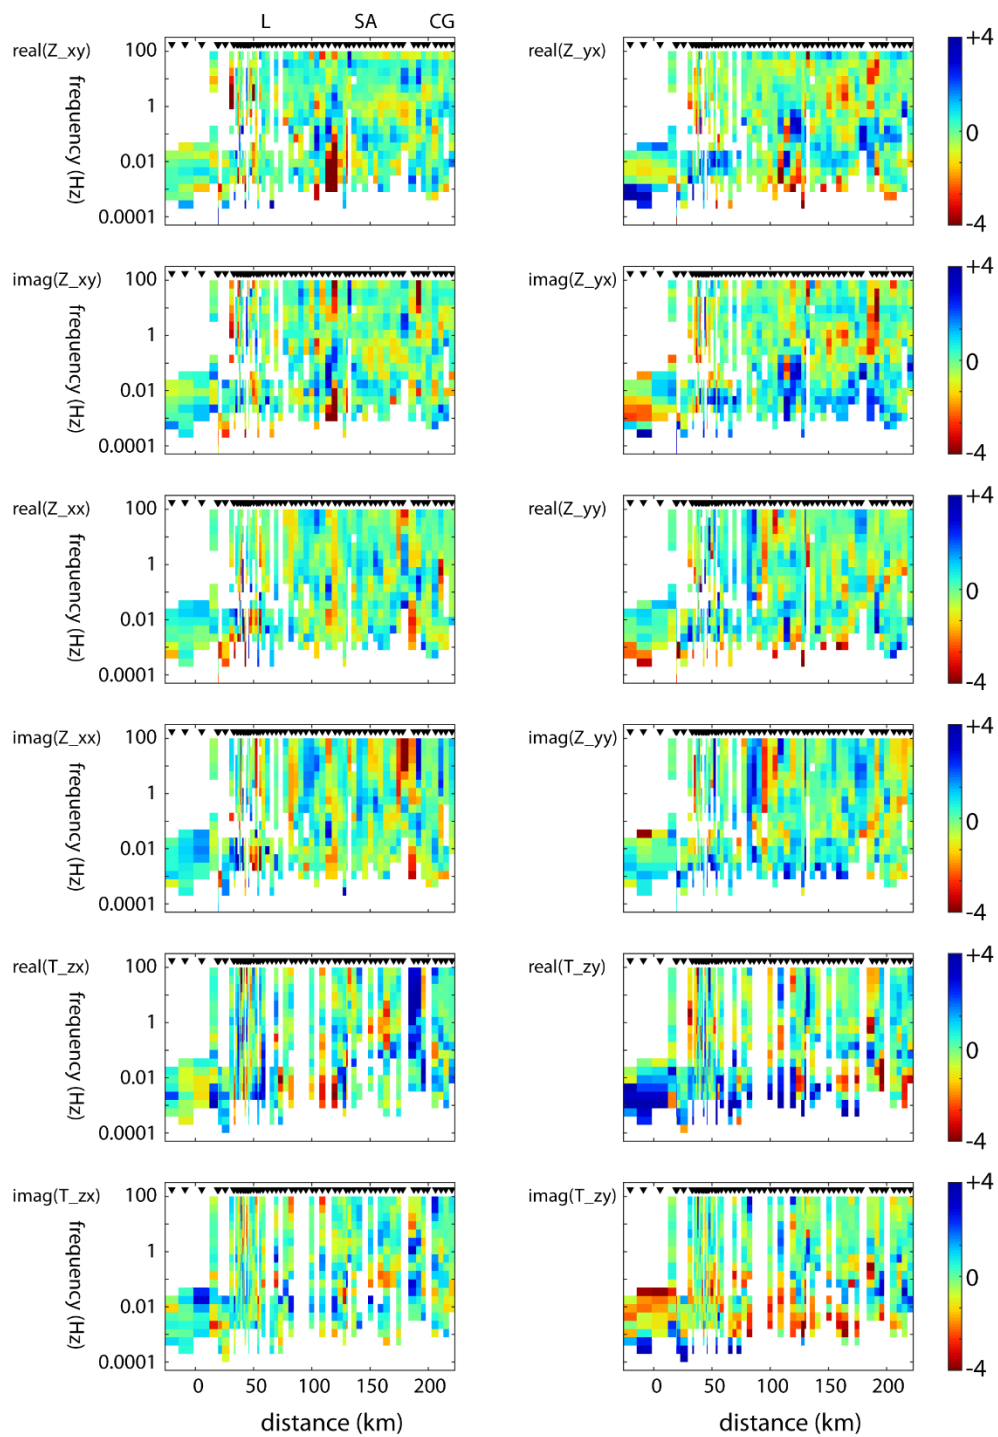

**Figure S4(b)** : Fit of predicted MT data (apparent resistivity, phase and tipper) in geographic coordinates for inversion model *puna\_lazufre\_61c* plotted as residuals.

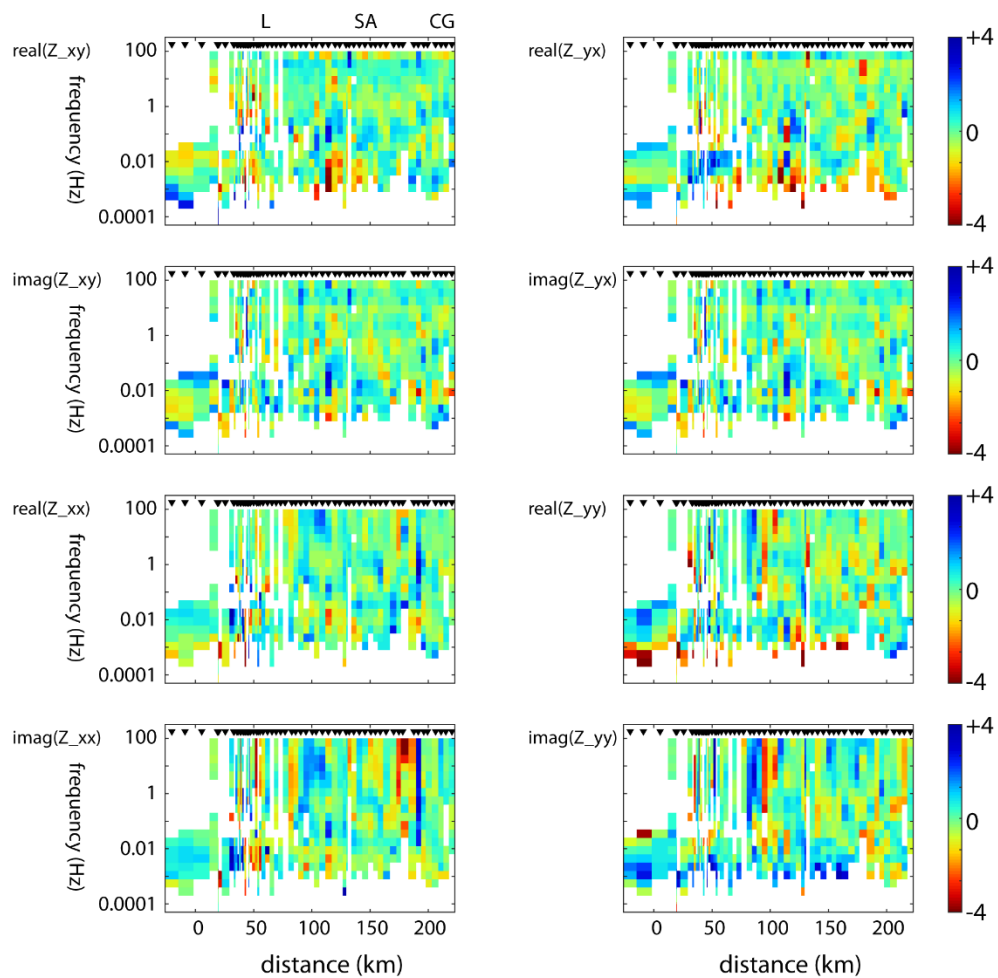

**Figure S4(c)** : Fit of predicted MT data (apparent resistivity and phase) in geographic coordinates for inversion model *puna\_lazufre\_68a* plotted as residuals.

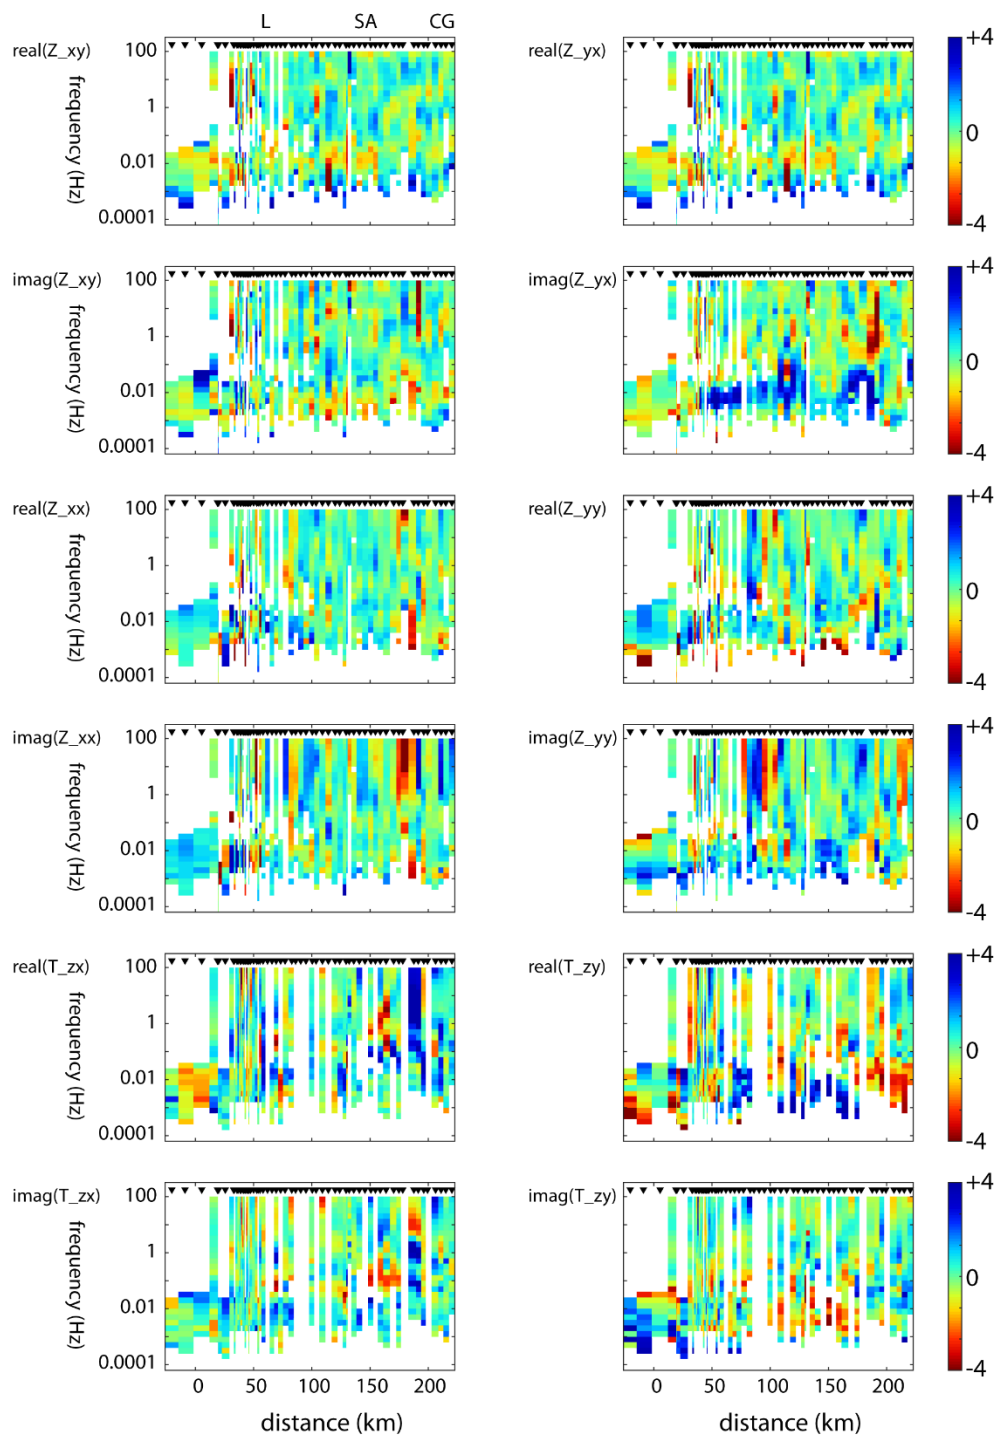

**Figure S4(d)** : Fit of predicted MT data (apparent resistivity, phase and tipper) in geographic coordinates for inversion model *puna\_lazufre\_68a* plotted as residuals.

### 3. Selected 3-D inversion models

Many individual inversions of the Puna MT data were performed. This section compares the four preferred models described in this paper.

|                               | Inversion name   | Data inverted      | Starting model                              | Starting r.ms. misfit | Final r.ms. misfit | Iterations |
|-------------------------------|------------------|--------------------|---------------------------------------------|-----------------------|--------------------|------------|
| <b>Model-1<br/>Figure 6</b>   | puna_lazufre_60a | Impedance + tipper | 10 $\Omega$ m                               | 7.50                  | 1.60               | 207        |
| <b>Model-2<br/>Figure 7</b>   | puna_lazufre_61c | Impedance + tipper | 10 $\Omega$ m + 1000 $\Omega$ m Nazca plate | 7.54                  | 1.63               | 218        |
| <b>Model-3<br/>Figure S5c</b> | puna_lazufre_68a | Impedance          | 10 $\Omega$ m                               | 7.99                  | 1.42               | 173        |
| <b>Model-4<br/>Figure S5d</b> | puna_lazufre_8a  | Impedance + tipper | 100 $\Omega$ m                              | 22.76                 | 1.80               | 179        |

**Table S2** : Summary of the four inversion models described in the Supplemental Material.

Figure S5 shows vertical and horizontal slices of these four models for comparison. As noted in the main text, it was found that the best fit was obtained when the starting model was a 10  $\Omega$ m halfspace. This allowed the inversion to place low resistivity regions in the lower crust and adjacent to Lazufre and Cerro Galan. This high sensitivity to the choice of starting model was not observed in other studies with the ModEM inversion when a grid of MT stations was used. It is possible that the higher resistivity starting model causes the inversion to become trapped in a local minimum. Our interpretation is that when a profile of stations, such as in this study, is inverted with a 3-D algorithm, the starting model exerts more influence because it imposes smoothing on the north and south edges of the model, in addition to the base. In the inversion of a grid of MT stations, the smoothing on the vertical edges will be reduced in comparison.

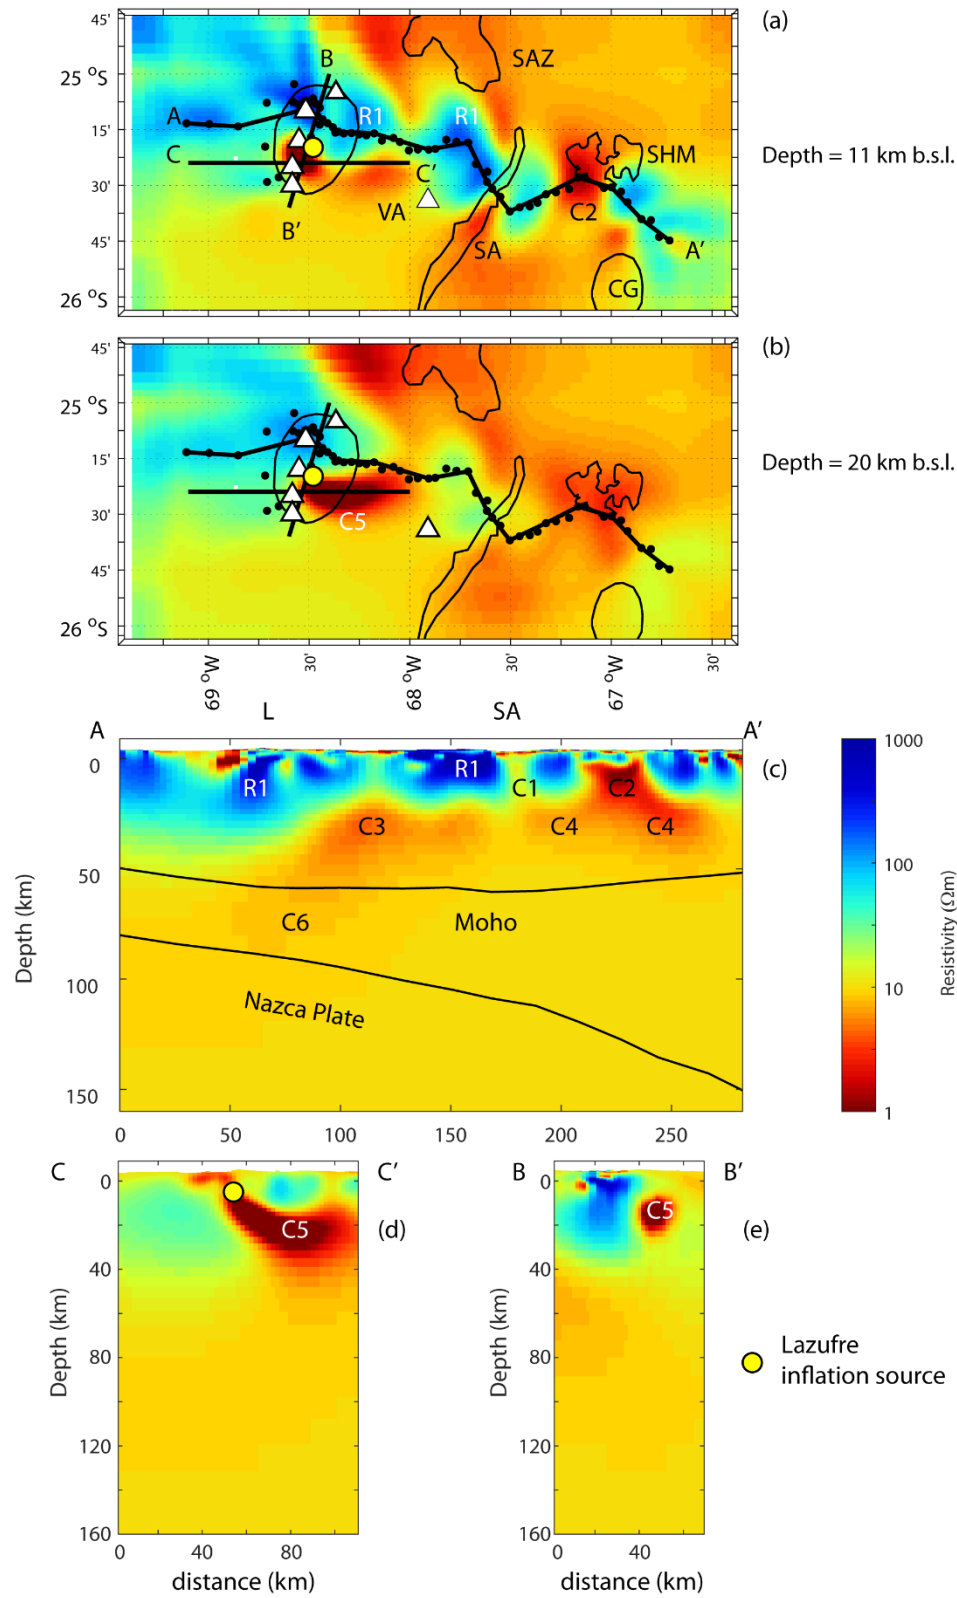

**Figure S5(a)** : Inversion model *puna\_lazufre\_60a* obtained by inversion of impedance and tipper data. Same model as in Figure 6 and shown here for comparison.

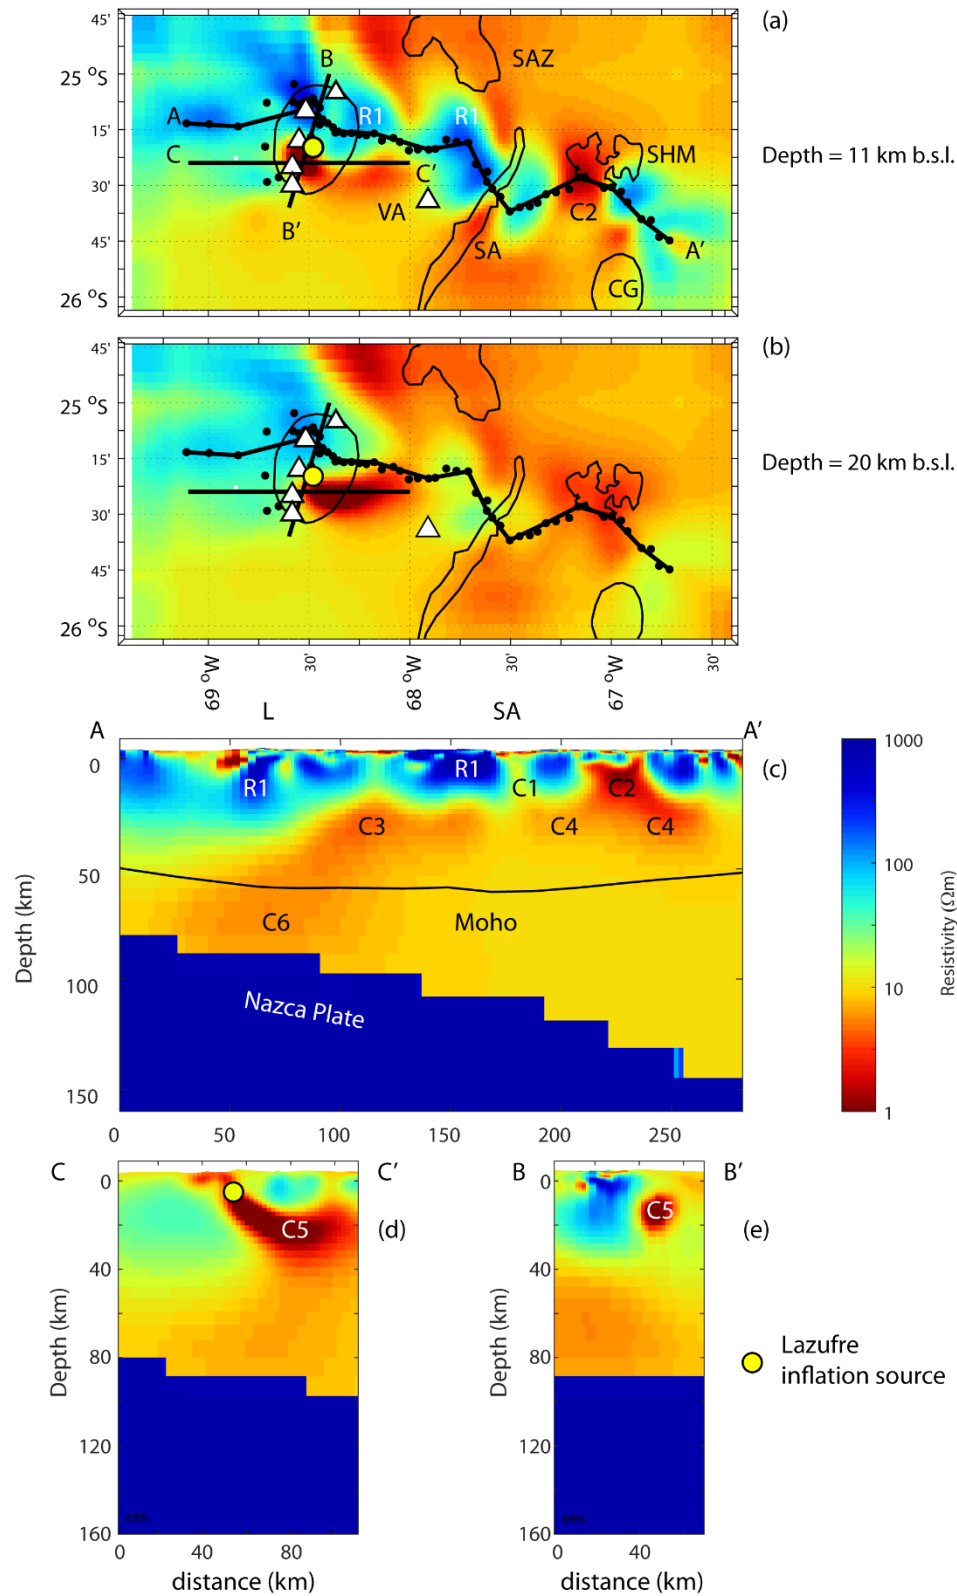

**Figure S5(b)** : Inversion model *puna\_lazufre\_61c* obtained by inversion of impedance and tipper data, starting from a model that represented the Nazca Plate as a resistor. Same as Figure 7.

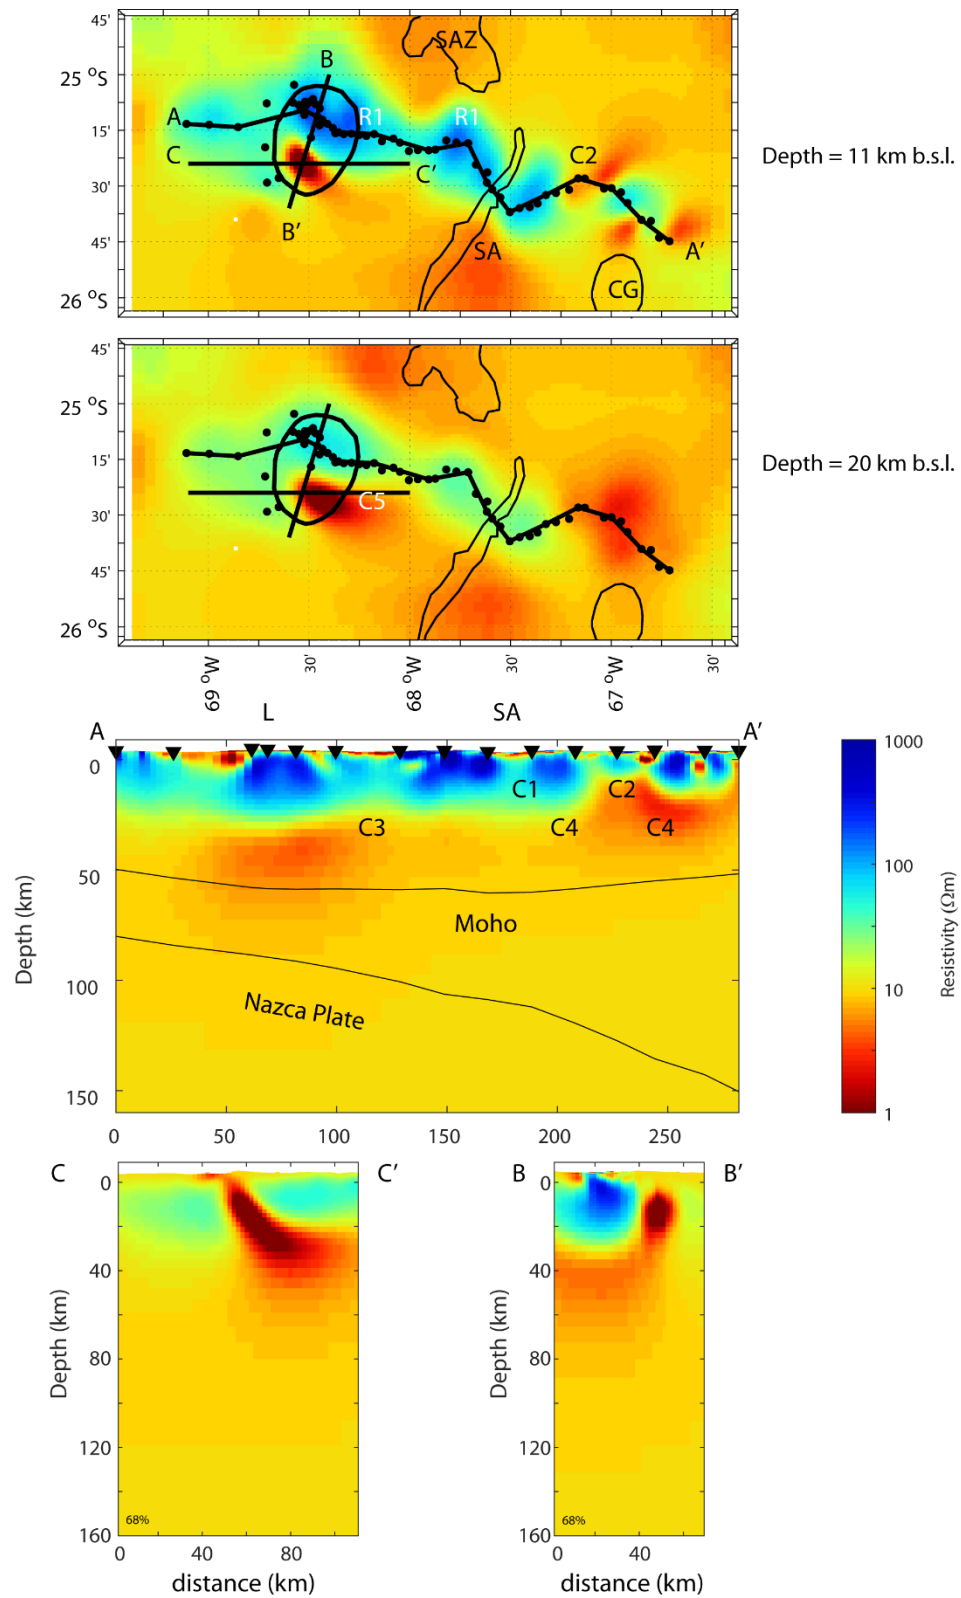

**Figure S5(c)** : Inversion model *puna\_lazufre\_68a* obtained by inversion of impedance data only.

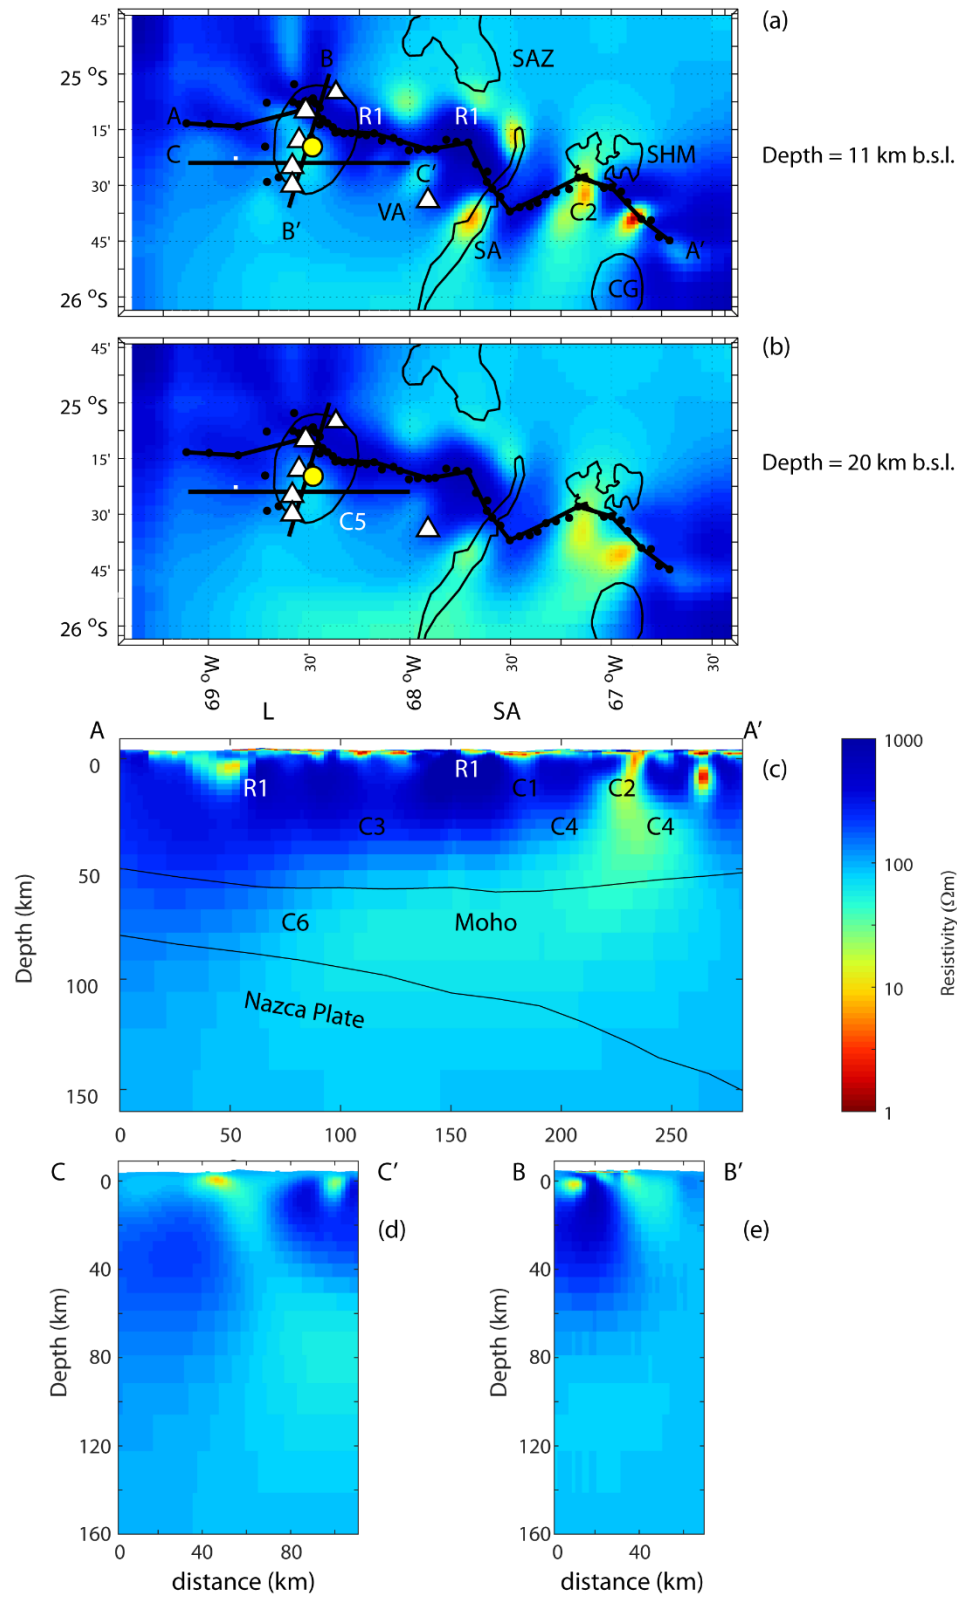

**Figure S5(d)** : Inversion model *puna\_lazufre\_8a* obtained by inversion of impedance and tipper data. Starting model was 100 Ωm.



## 4. Sensitivity tests

### 4.1 Sensitivity to resistivity below a specified depth

In the first set of edits, the model was made resistive below a specified depth and the results are illustrated in Figure S6 and summarized in Table S3. Changing the model below 50 km produced a relatively small change in overall misfit at frequencies less than 0.001 Hz. When the model was changed at depth of 40 km or shallower, a significant change in misfit occurred. All of the above model editing exercises used a statistical approach to determine if the change in misfit was significant using the method described by Lee et al., (2020).

|                        |               |                 | r.m.s. misfit |        |         |
|------------------------|---------------|-----------------|---------------|--------|---------|
| Name                   | Region edited | resistivity     | impedance     | tipper | Overall |
| Puna_lazufre_60a       |               |                 | 1.54          | 1.72   | 1.60    |
| Puna_lazufre_60a_edit1 | z > 50 km     | 1000 $\Omega$ m | 2.02          | 1.81   | 1.95    |
| Puna_lazufre_60a_edit2 | z > 40 km     | 1000 $\Omega$ m | 2.50          | 1.88   | 2.32    |
| Puna_lazufre_60a_edit3 | z > 30 km     | 1000 $\Omega$ m | 3.25          | 1.99   | 2.92    |
| Puna_lazufre_60a_edit4 | z > 20 km     | 1000 $\Omega$ m | 5.64          | 2.29   | 4.84    |
| Puna_lazufre_60a_edit5 | z > 10 km     | 1000 $\Omega$ m | 9.12          | 2.87   | 7.72    |

**Table S3** : Summary of sensitivity tests presented in Figure S6.

### 4.2 Sensitivity to model feature C5

In a second set of tests, feature C5 was made resistive and this is illustrated in Figure S7. The removal of feature C5 produces a significant change, especially in the region of high  $\phi_{yx}$  values at frequencies less than 0.01 Hz and located east of Lazufre. This is as expected for an east-west oriented conductor that will primarily have a response in the yx component of the impedances, since the east-west electric currents will be strongest in an east-west oriented conductor.

|                         |                                                       |                | r.m.s. misfit |        |         |
|-------------------------|-------------------------------------------------------|----------------|---------------|--------|---------|
| Name                    | Region edited                                         | resistivity    | impedance     | tipper | Overall |
| Puna_lazufre_60a        |                                                       |                | 1.54          | 1.72   | 1.60    |
| Puna_lazufre_60a_edit10 | z = 5 to 30 km<br>68.6°W to 68°W<br>25.5°S to 25.25°S | 100 $\Omega$ m | 1.74          | 1.79   | 1.75    |

**Table S4** : Resolution test for model feature C5

Model : puna\_lazufre\_60a : Original

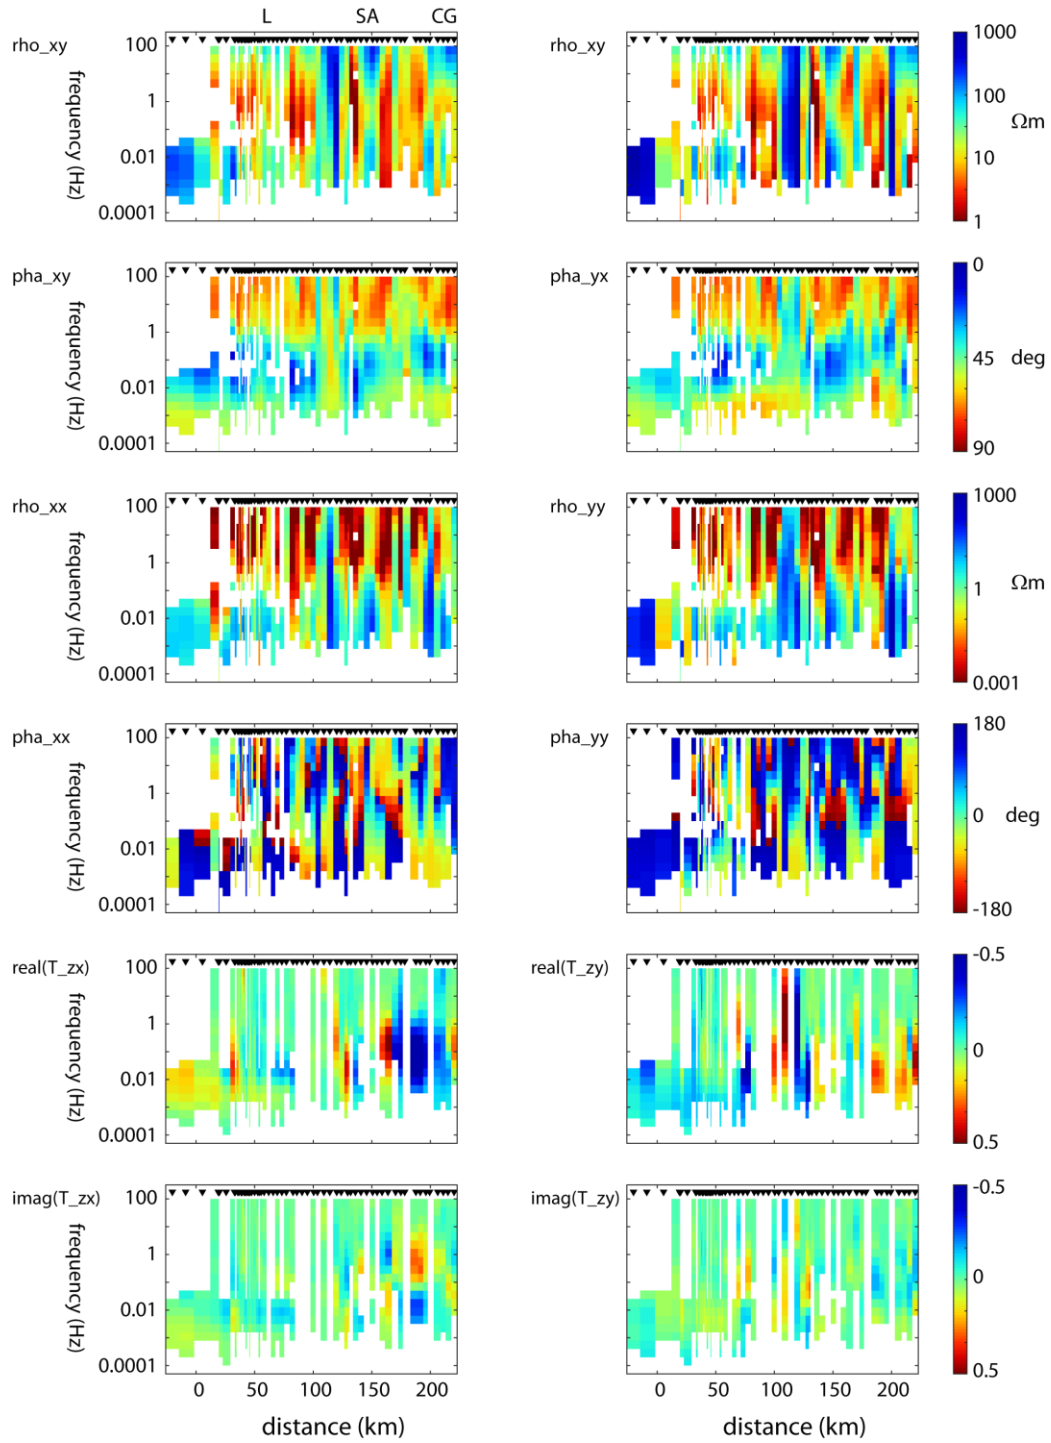

**Figure S6(a)** : Predicted data for the unedited inversion model *puna\_lazufre\_60a*.

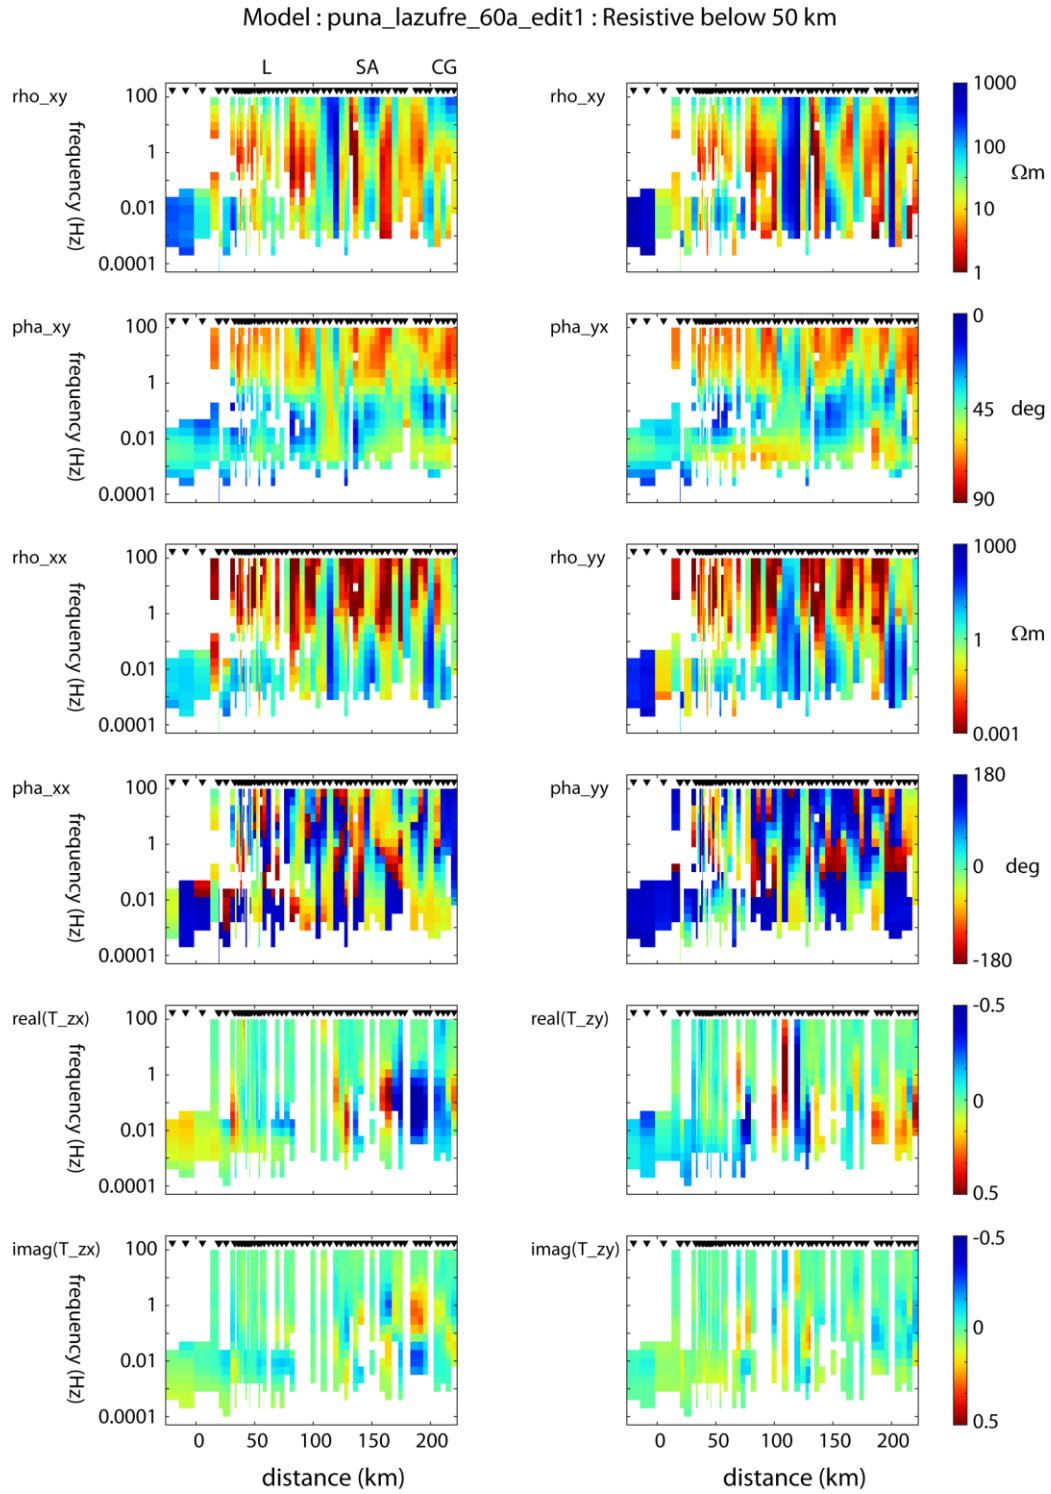

**Figure S6(b)** : Forward response of edited model *puna\_lazufre\_60a* with model replaced by a 1000  $\Omega\text{m}$  beginning at a depth of 50 km.

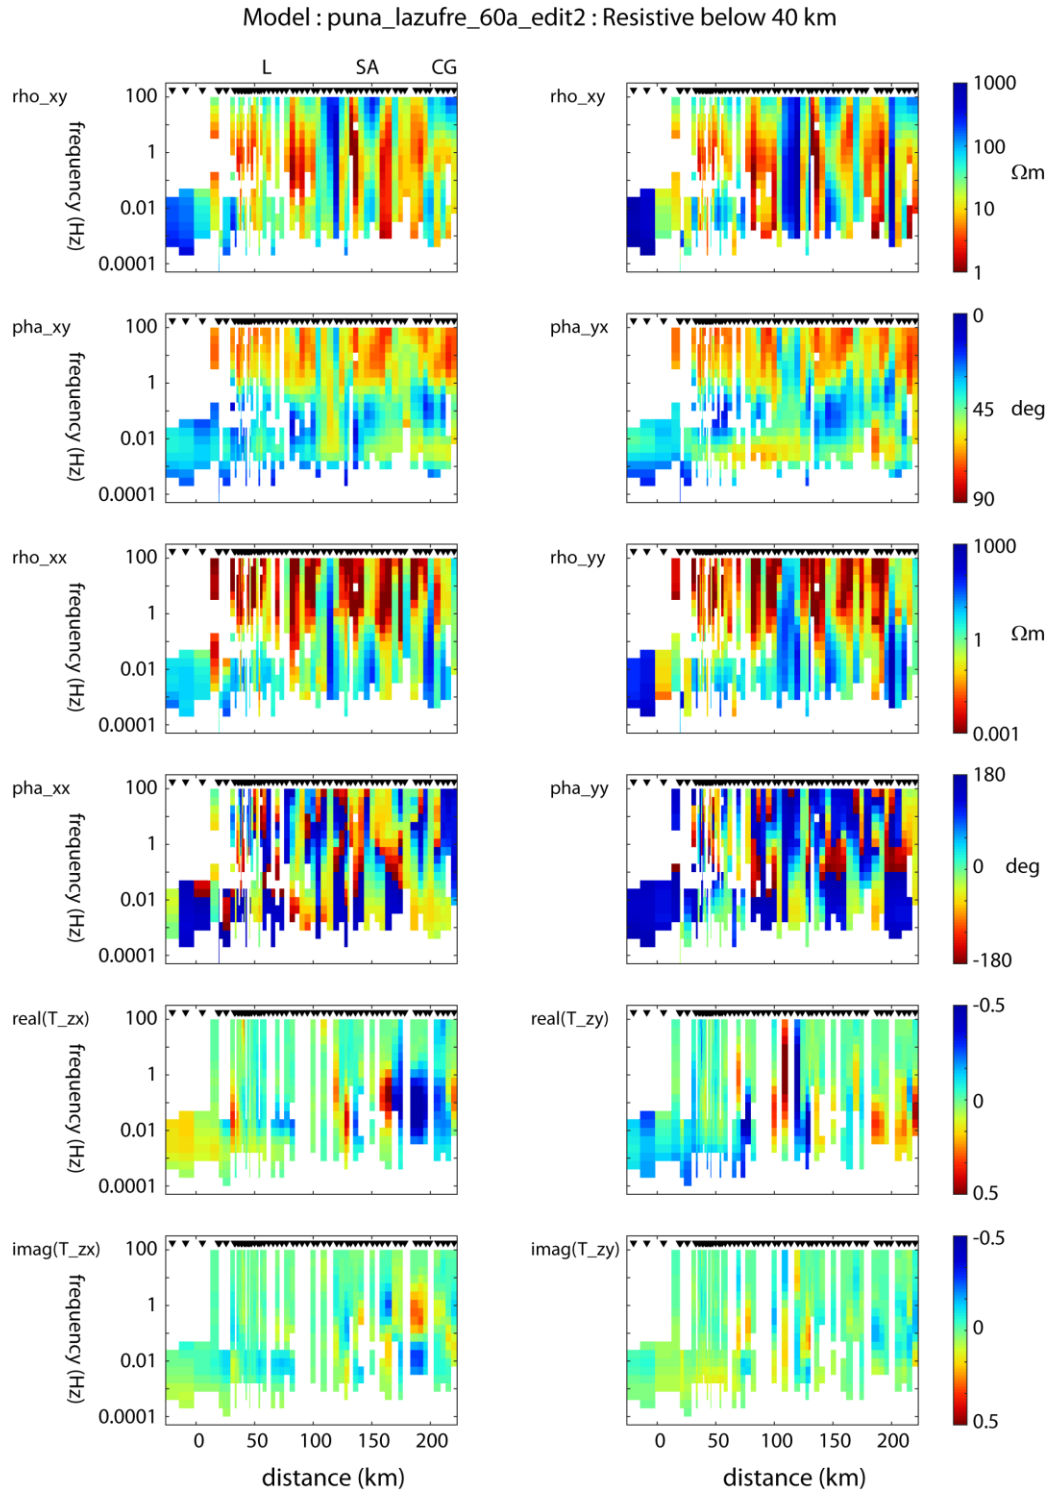

**Figure S6(c)** : Forward response of edited model *puna\_lazufre\_60a* with model replaced by a 1000  $\Omega\text{m}$  beginning at a depth of 40 km.

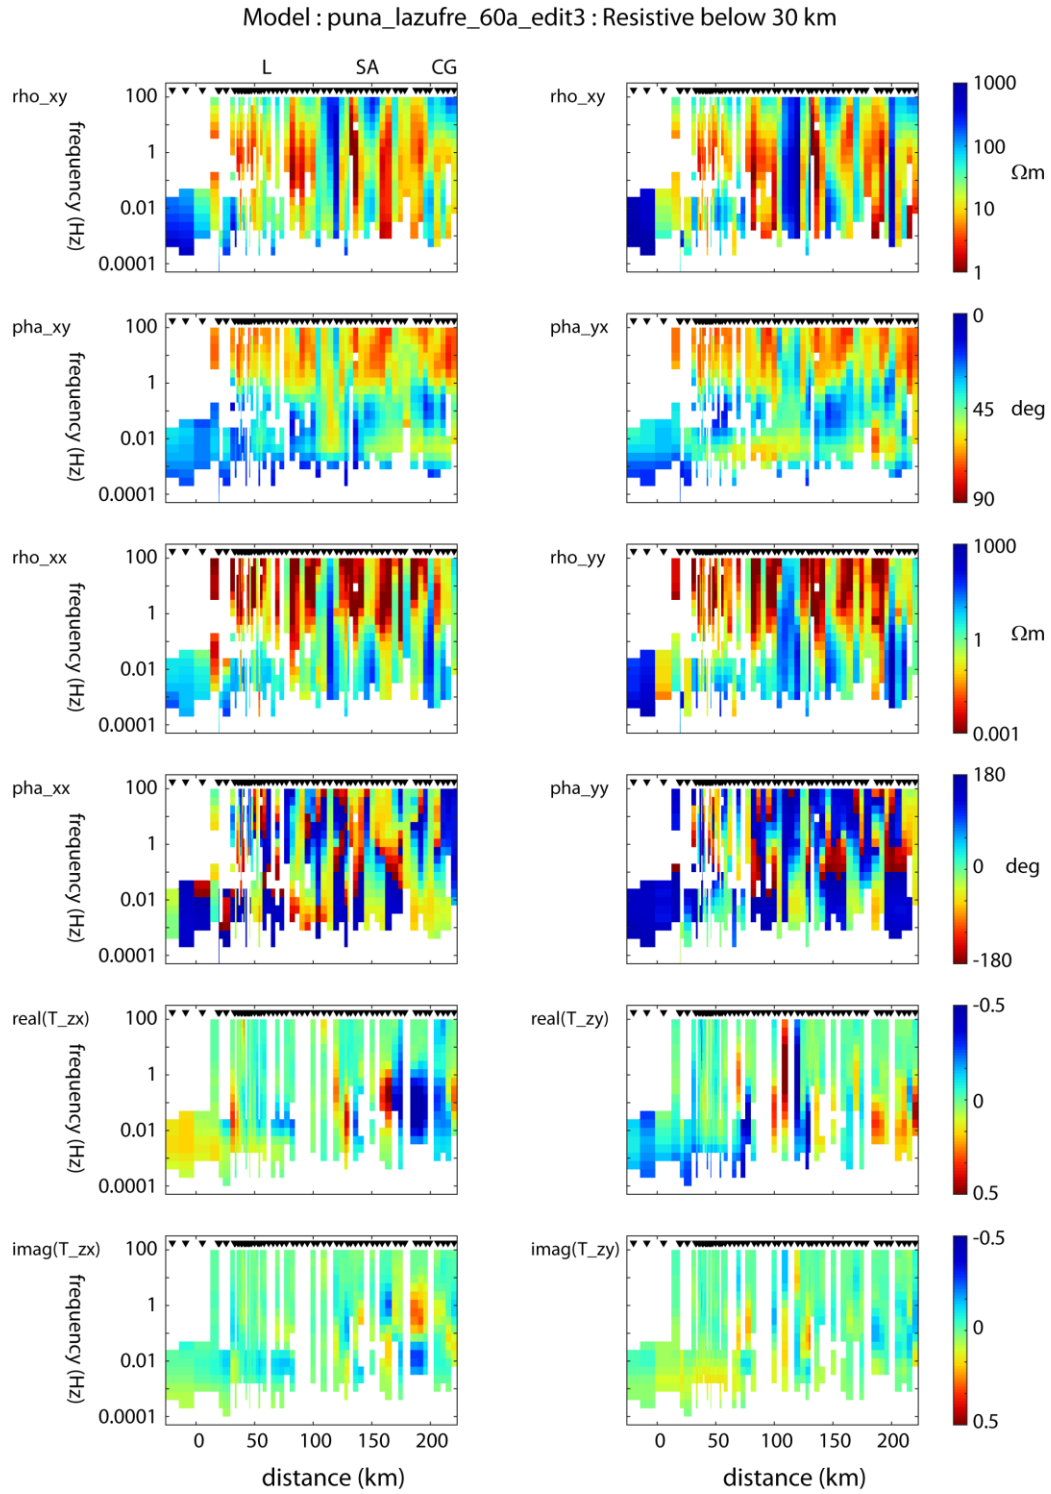

**Figure S6(d)** : Forward response of edited model *puna\_lazufre\_60a* with model replaced by a 1000  $\Omega\text{m}$  beginning at a depth of 30 km.

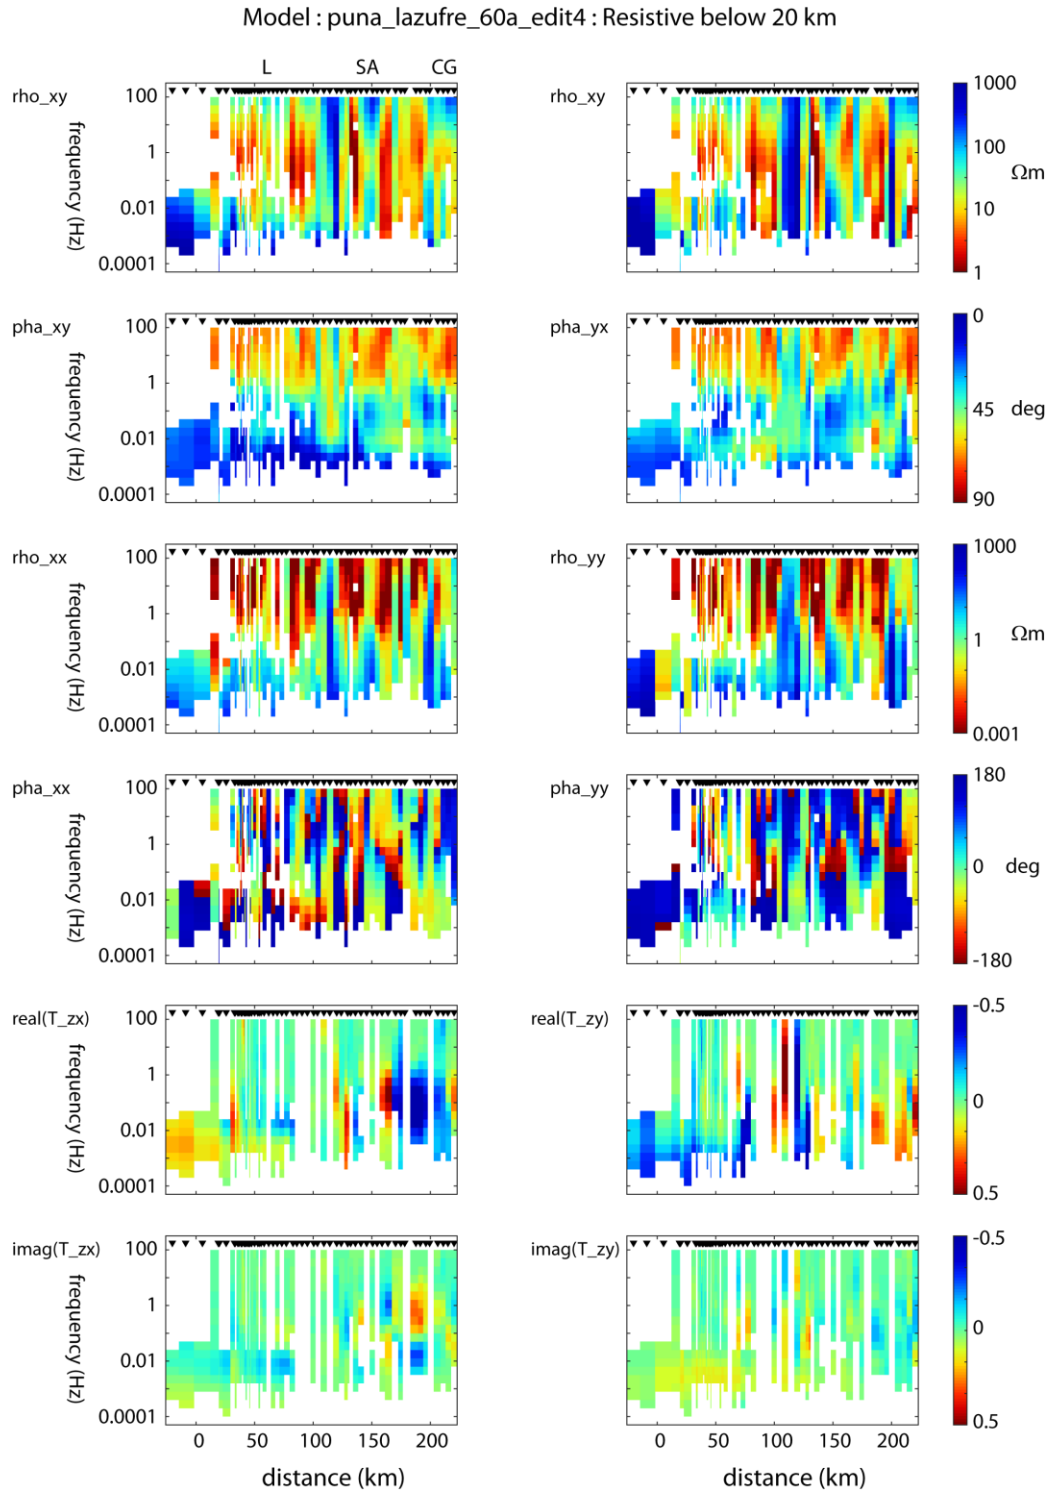

**Figure S6(e)** : Forward response of edited model *puna\_lazufre\_60a* with model replaced by a 1000  $\Omega\text{m}$  beginning at a depth of 20 km.

**Figure S6(f)** : Forward response of edited model *puna\_lazufre\_60a* with model replaced by a 1000  $\Omega\text{m}$  beginning at a depth of **10 km**.

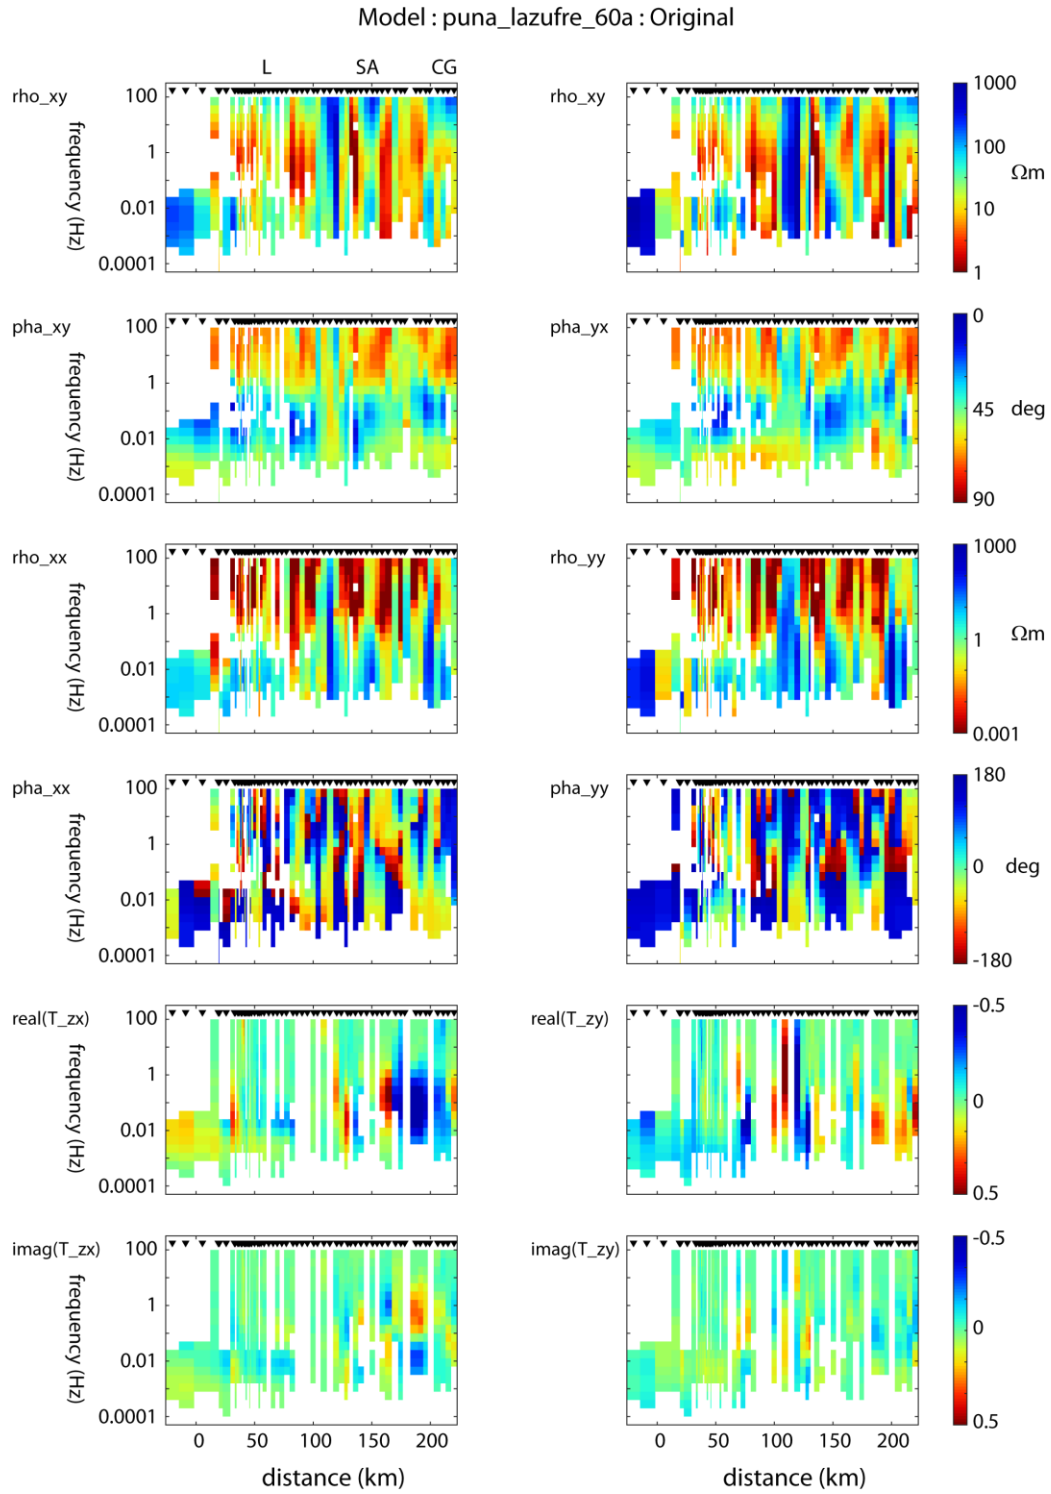

**Figure S7(a)** : Predicted data for the unedited inversion model *puna\_lazufre\_60a*.



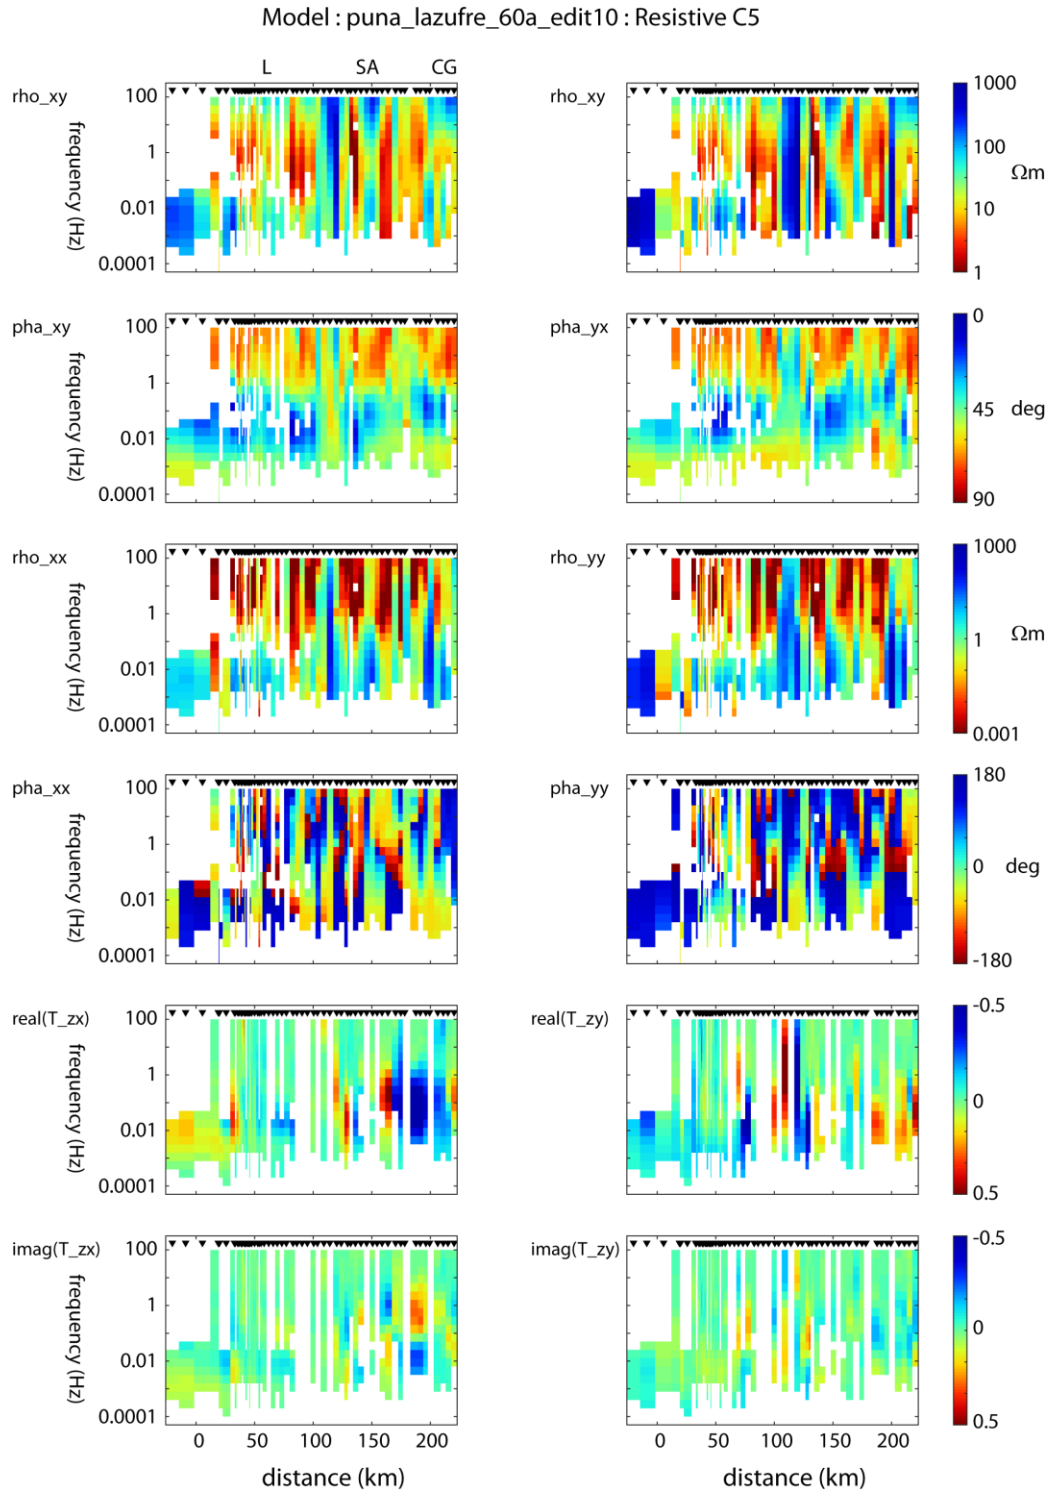

**Figure S7(b)** : Forward response of edited model *puna\_lazufre\_60a* with resistivity of model feature C5 set to 100  $\Omega\text{m}$ .

## 5. Synthetic MT inversions

The inversion models were further investigated using a synthetic inversion approach. A range of synthetic models were considered and representative results are presented in Figure S8.

Model *syn2* is characterized by a 30  $\Omega\text{m}$  crust, a 10  $\Omega\text{m}$  mantle wedge and a 1000  $\Omega\text{m}$  Nazca Plate. Within the crust, two conductive prisms with resistivity 1  $\Omega\text{m}$  were added to represent the two conductors detected in the field MT data inversion shown in Figures 6 and 7. These features correspond to the Lazufre Anomaly (LA) and Cerro Galan Anomaly (CGA) reported in the seismic study of Ward et al., (2017) and Bianchi et al., (2013). The synthetic model includes topography. Synthetic MT data were generated and Gaussian noise added at the 5% level. The synthetic data were then inverted using the same approach as for the field MT data and the results are shown in Figure S8(a) and S8(b). A synthetic inversion (*puna\_lazufre\_syn2\_14*) began from a 10  $\Omega\text{m}$  halfspace, and converged with a damping factor of  $\lambda = 10^{-8}$  after 100 iterations to a final r.m.s. misfit of 1.11.

The two crustal conductors are well imaged in the vertical sections. The resistive Nazca plate was not imaged, but this is as expected based on the model editing shown in Figure S6. In map view, it can be seen that the north-south extent of the conductors in the inversion models is limited by the spatial extent of the data.

Model *syn4* is illustrated in Figure S8(c) and Figure S8(d) and is identical to model *syn2*, except for the addition of a conductor to represent feature C5 in the models shown in Figures 6 and 7. A synthetic inversion (*puna\_lazufre\_syn4\_14*) began from a 10  $\Omega\text{m}$  half-space, and converged with a damping factor of  $\lambda = 10^{-8}$  after 103 iterations to a final r.m.s. misfit of 1.05. The synthetic inversion for *syn4* shows that this feature is resolved by existing data coverage, and can be seen to have an eastward dip.

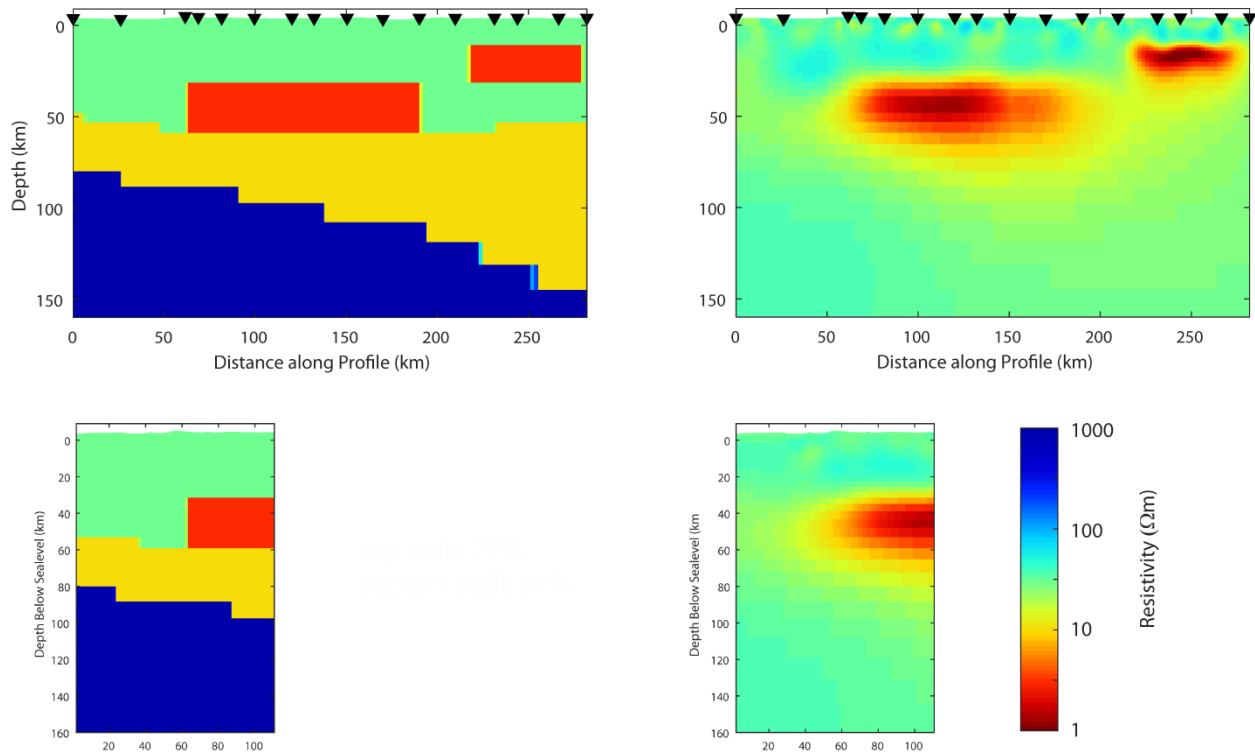

**Figure S8(a)** : Synthetic inversion test (syn2) used to investigate the resolution of the 3-D resistivity models presented in this study. The true model is shown in the left-hand column and contains 2-D conductors that strike north-south. One is located east of Lazufre and the other beneath Cerro Galan to represent the main features of the model presented in Figures 6 and 7. The true model contained an eastward dipping resistive feature that represents the Nazca Plate. The synthetic data has 5% noise added to the impedance and 0.02 added to the tipper. Forward model was plotted with script syn2\_fwd\_plot.m and the inverse model was plotted with S3D\_v1.m

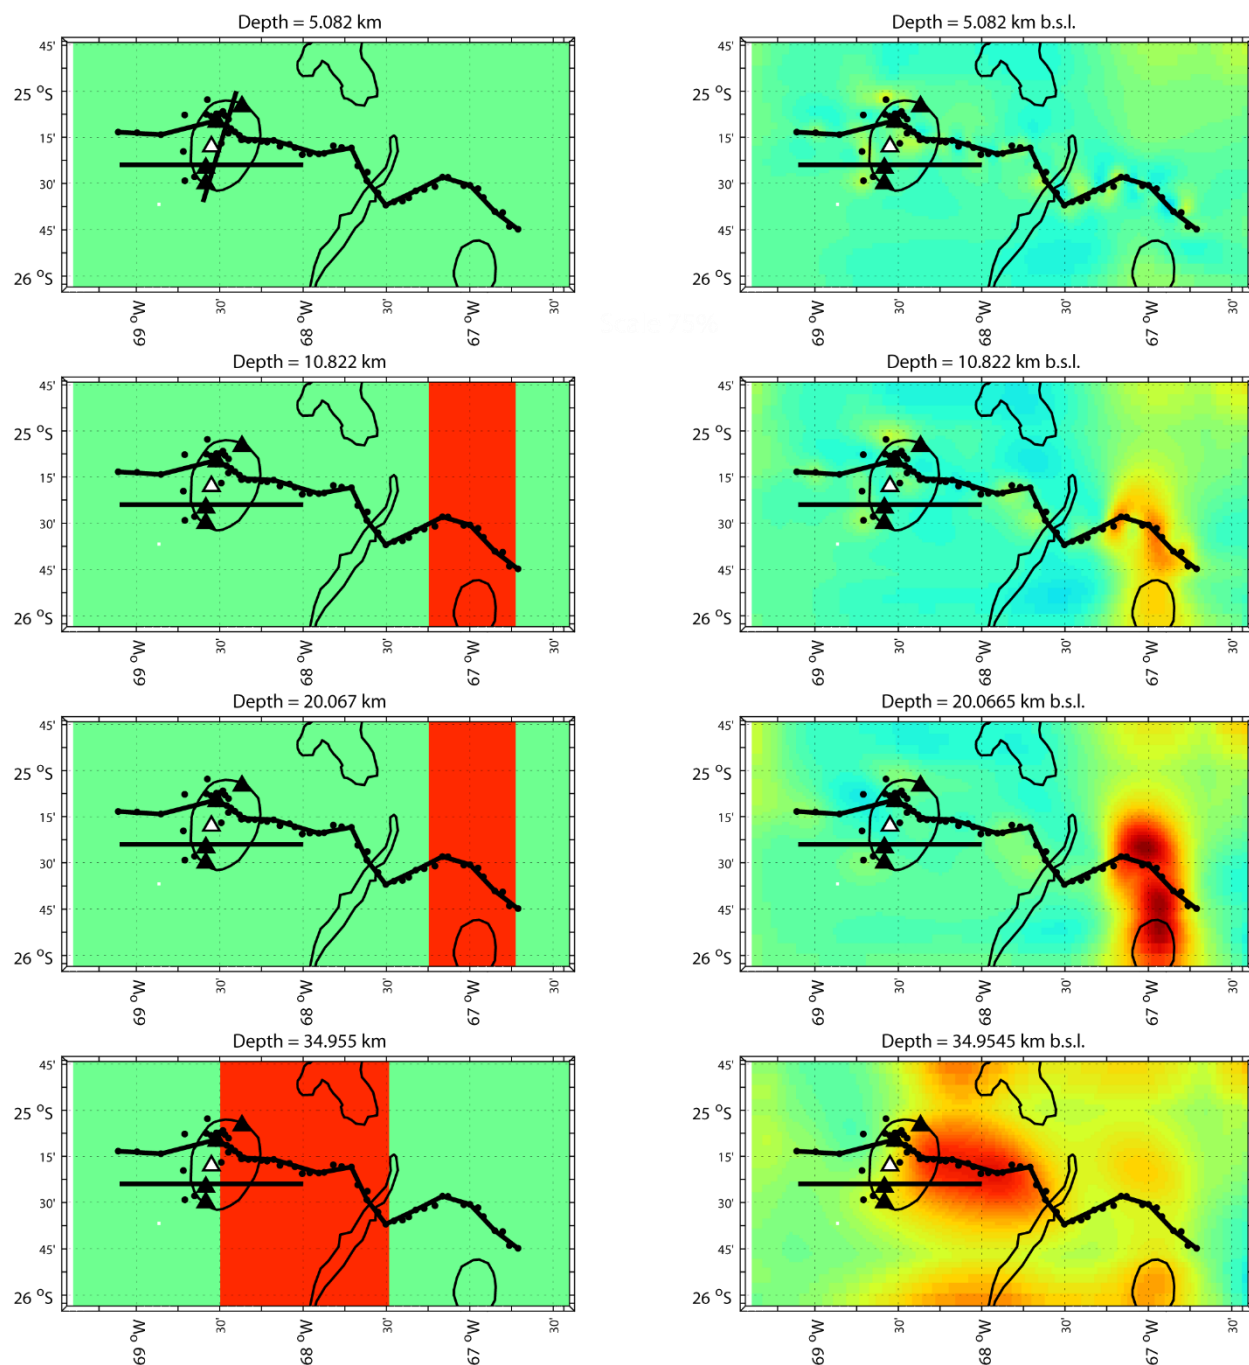

**Figure S8(b)** : As previous figure, but showing the true model and inversion model in plan view at depths of 5, 11, 20 and 35 km. Note that the two conductors are recovered at the correct depths beneath the line of MT stations. Away from the profile of MT stations the conductors are not imaged as expected. The resistive Nazca plate is not imaged in the inversion. The colour scale is the same as in Figure 8(a). The forward model was plotted with script `syn2_fwd_plot.m` and the inverse model plotted with `S3D_v1.m`

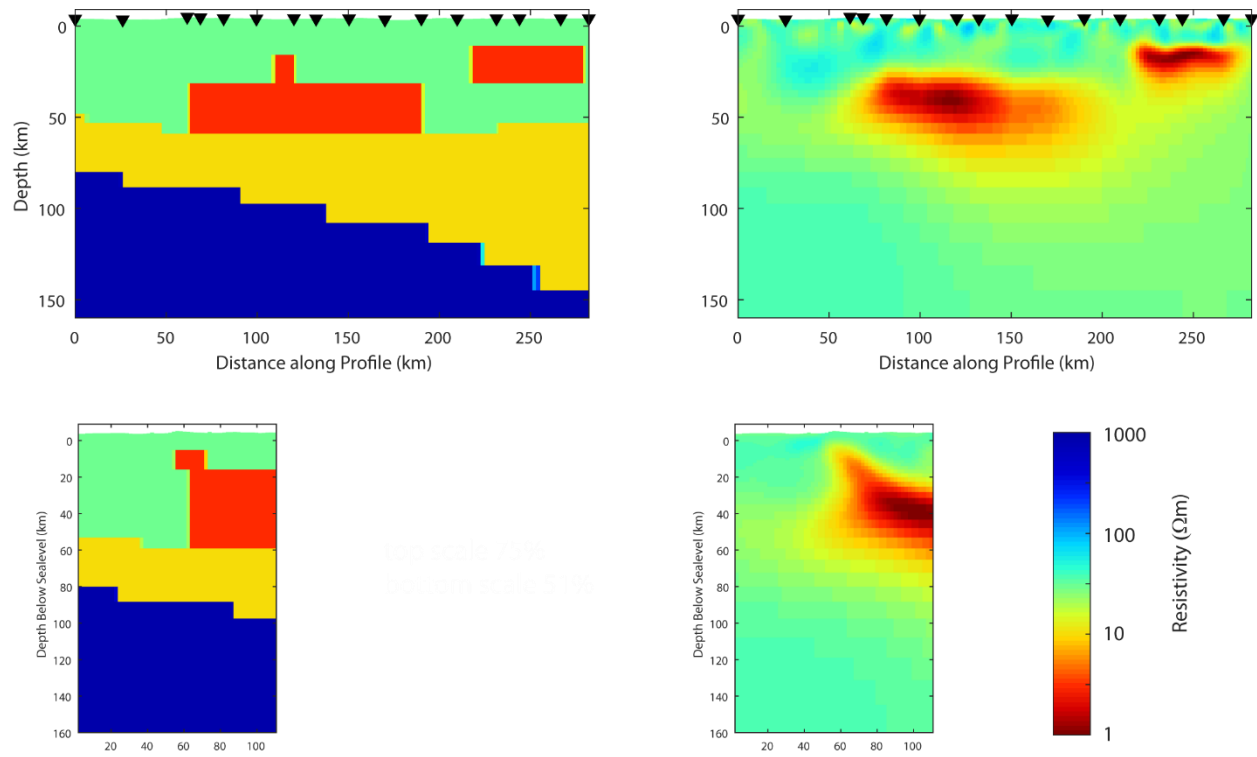

**Figure S8(c)** : Synthetic inversion test (syn4) used to investigate the resolution of the 3-D resistivity models presented in this study. The difference with syn2 is that a third conductor has been added which rises to the inflation centre from the western conductor. The true model contained a dipping resistive feature that represents the Nazca Plate. The synthetic data has 5% noise added to the impedance and 0.02 added to the tipper. The forward model was plotted with script syn4\_fwd\_plot.m and the inverse model was plotted with S3D\_v1.m

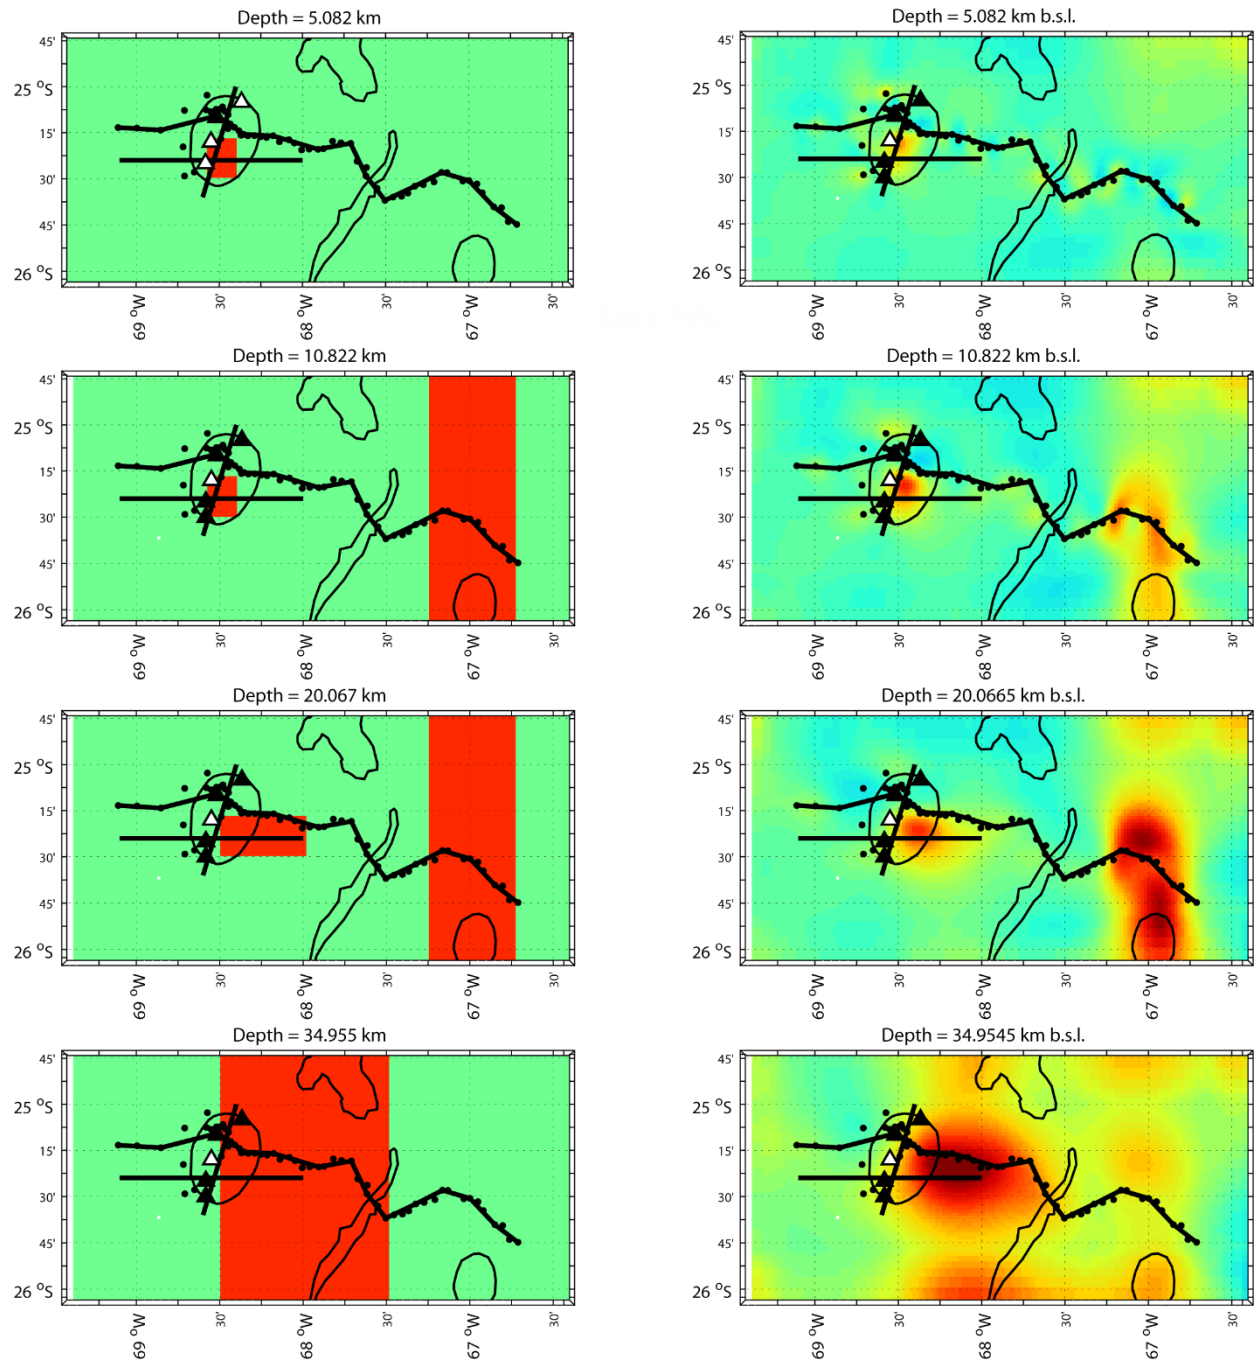

**Figure S8(d)** : As the previous figure, but showing the true model and inversion model in plan view at depths of 5, 11, 20 and 35 km. Note that the two conductors are recovered at the correct depths beneath the line of MT stations. Away from the profile of MT stations the conductors are not imaged as expected. The resistive Nazca plate is not imaged in the inversion. The colour scale is the same as in Figure 8(a) and (c). The forward model was plotted with script `syn4_fwd_plot.m` and the inverse model was plotted with `S3D_v1.m`
